# Supplementary material for: Complete genome sequence and the expression pattern of plasmids of the model ethanologen Zymomonas mobilis ZM4 and its xylose-utilizing derivatives 8b and 2032
Source: PubMed Central journal article supplement (PMC5930841; doi:10.1186/s13068-018-1116-x), 2018-05-02
Supplement: 13068_2018_1116_MOESM1_ESM.pdf [file 13068_2018_1116_MOESM1_ESM.pdf]

# Gap closure of plasmid sequences by primer walking

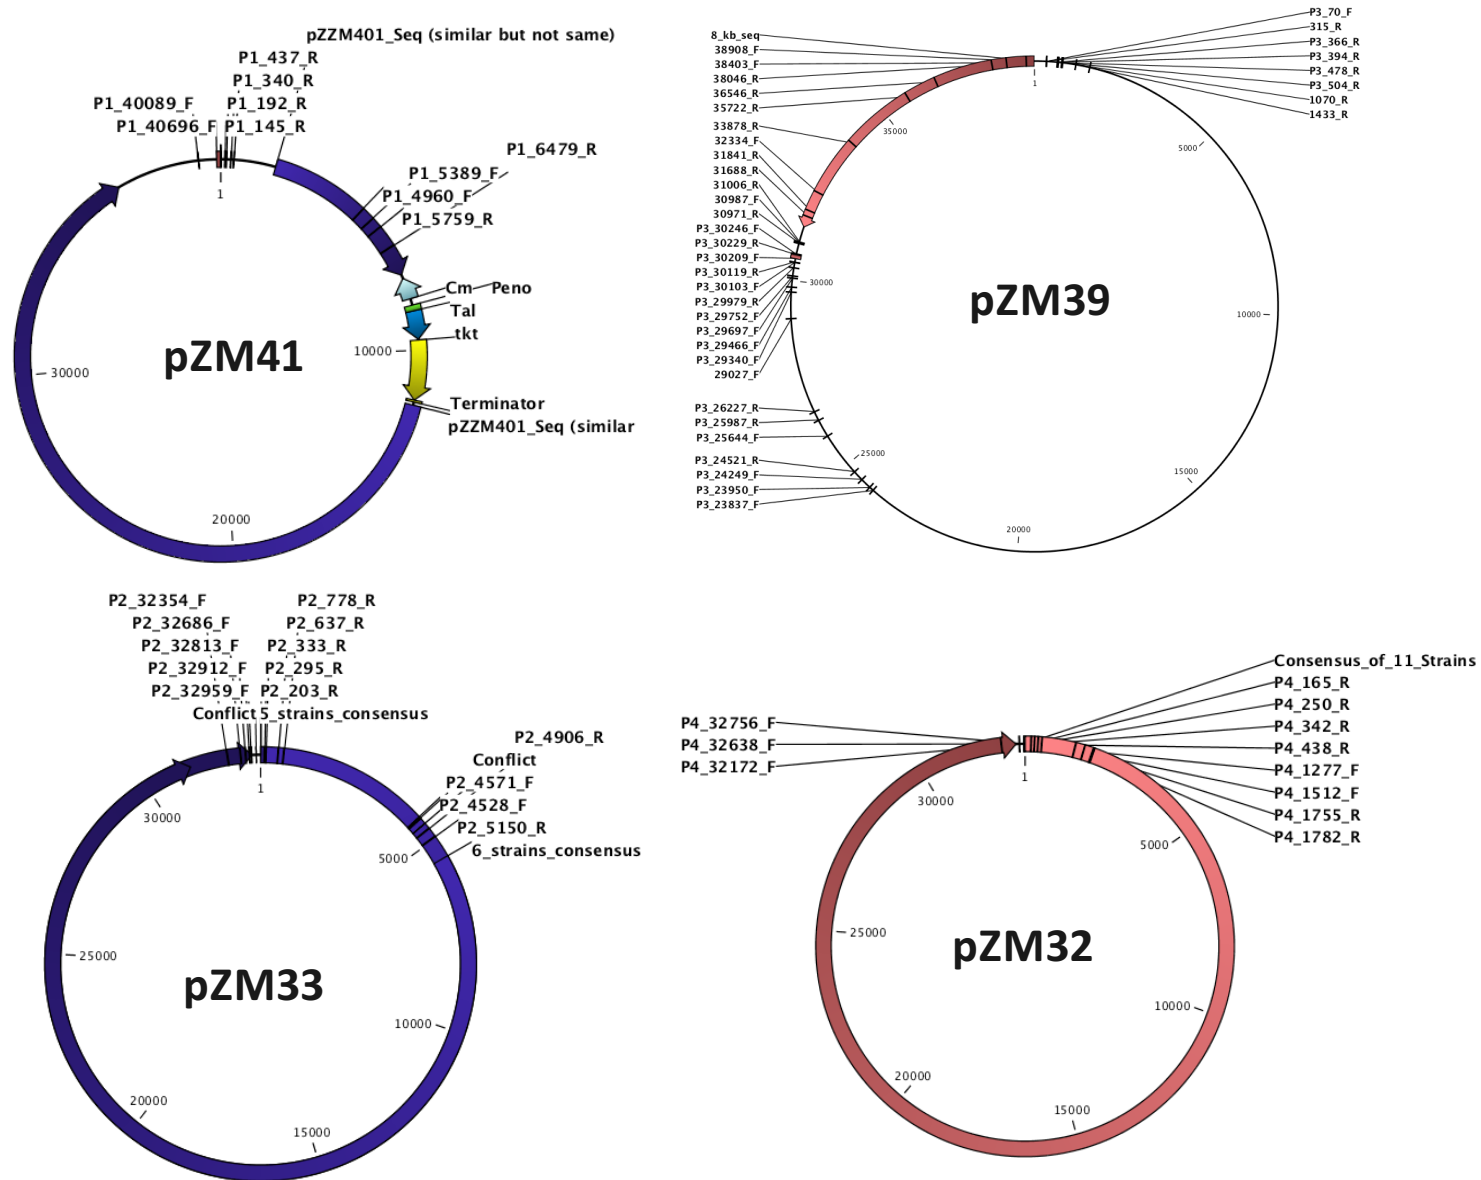

Fig. S1A

# Identification of the missing chromosomal sequence using NGS

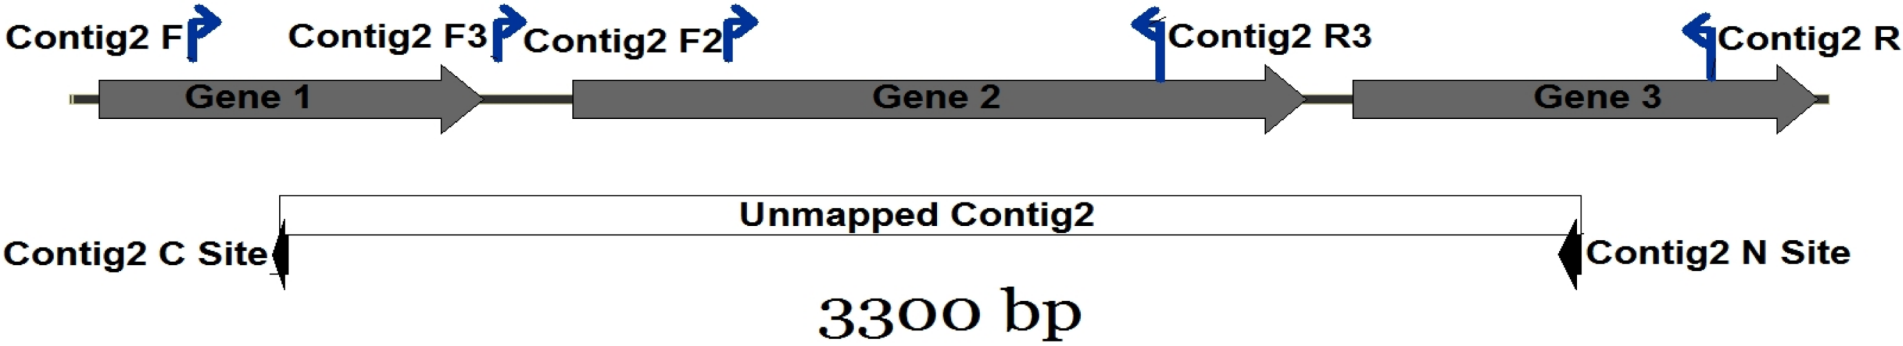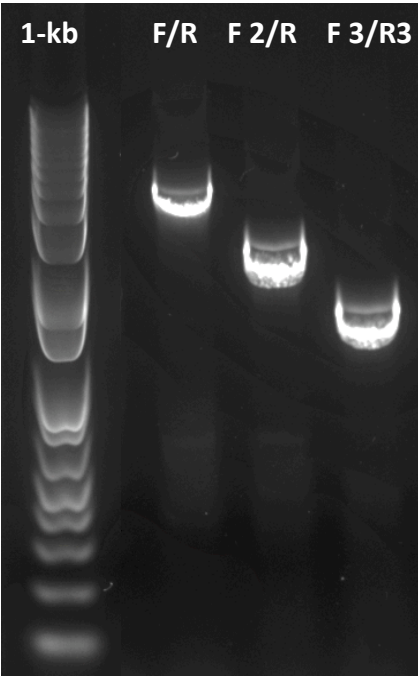

Fig. S1B

# Efficient customized rRNA depletion kit developed for RNA-Seq

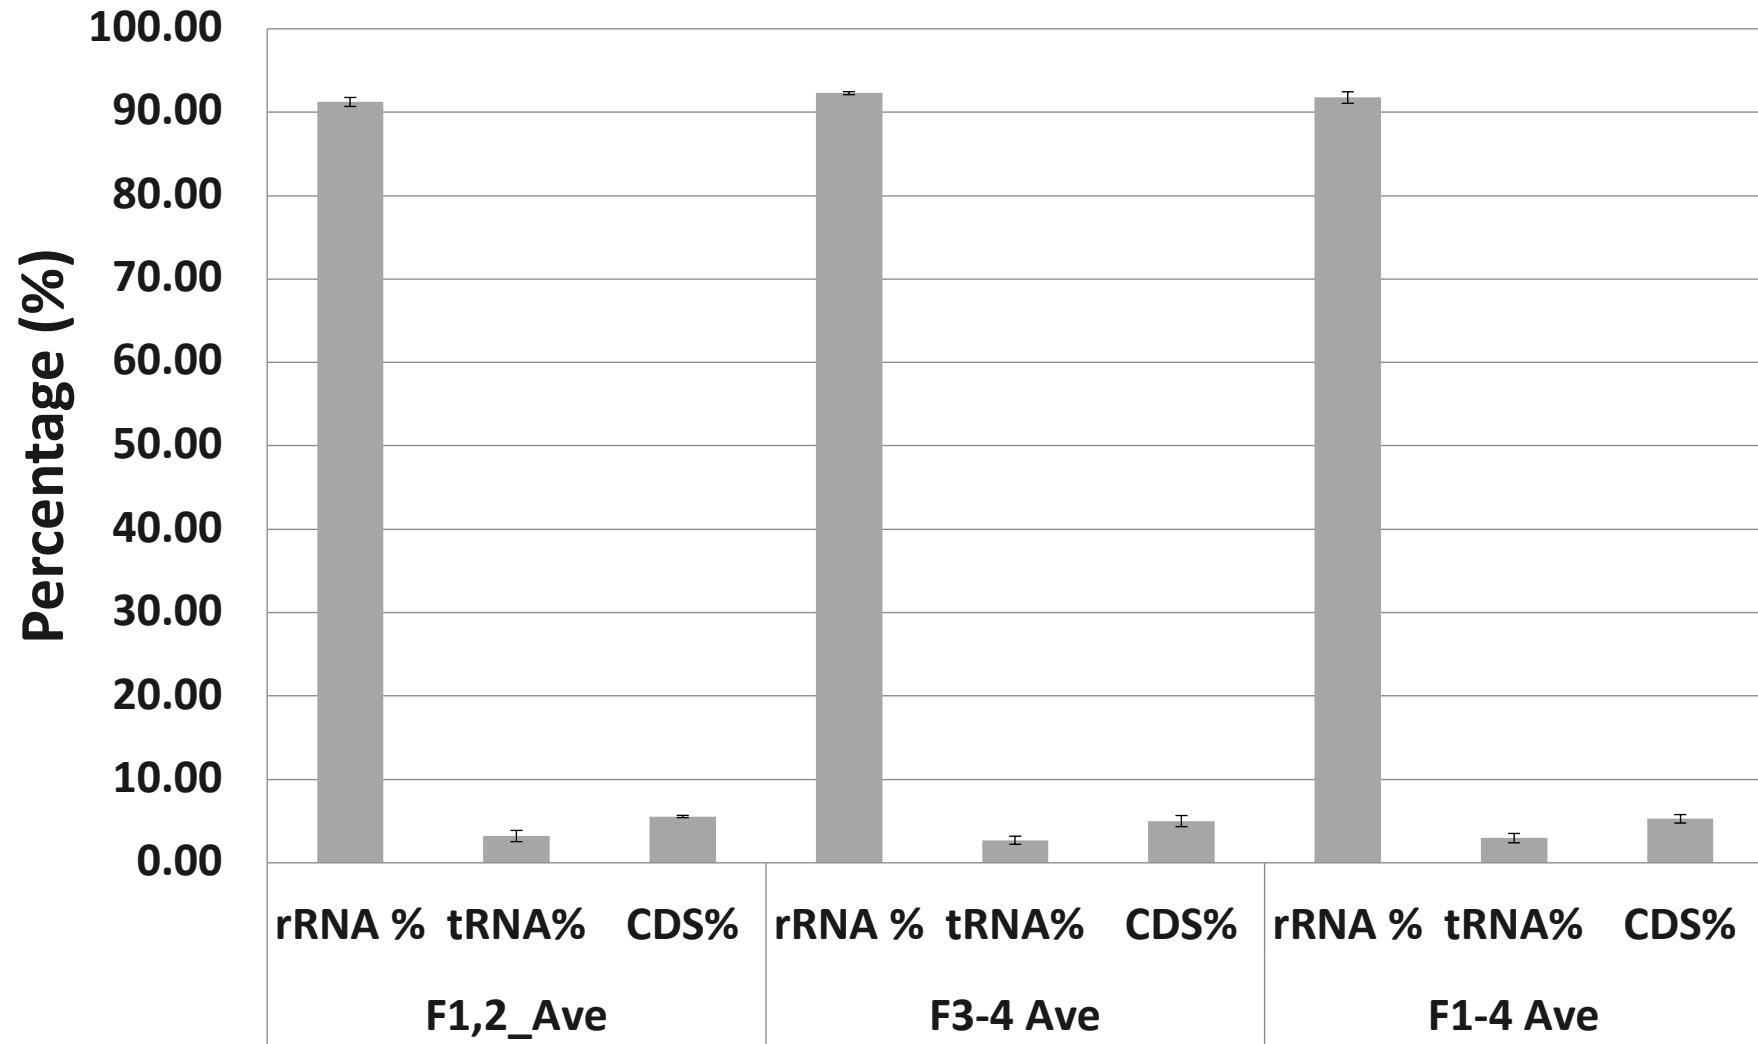

Fig. S2A

# Confirmation of rRNA depletion efficiency by qRT-PCR

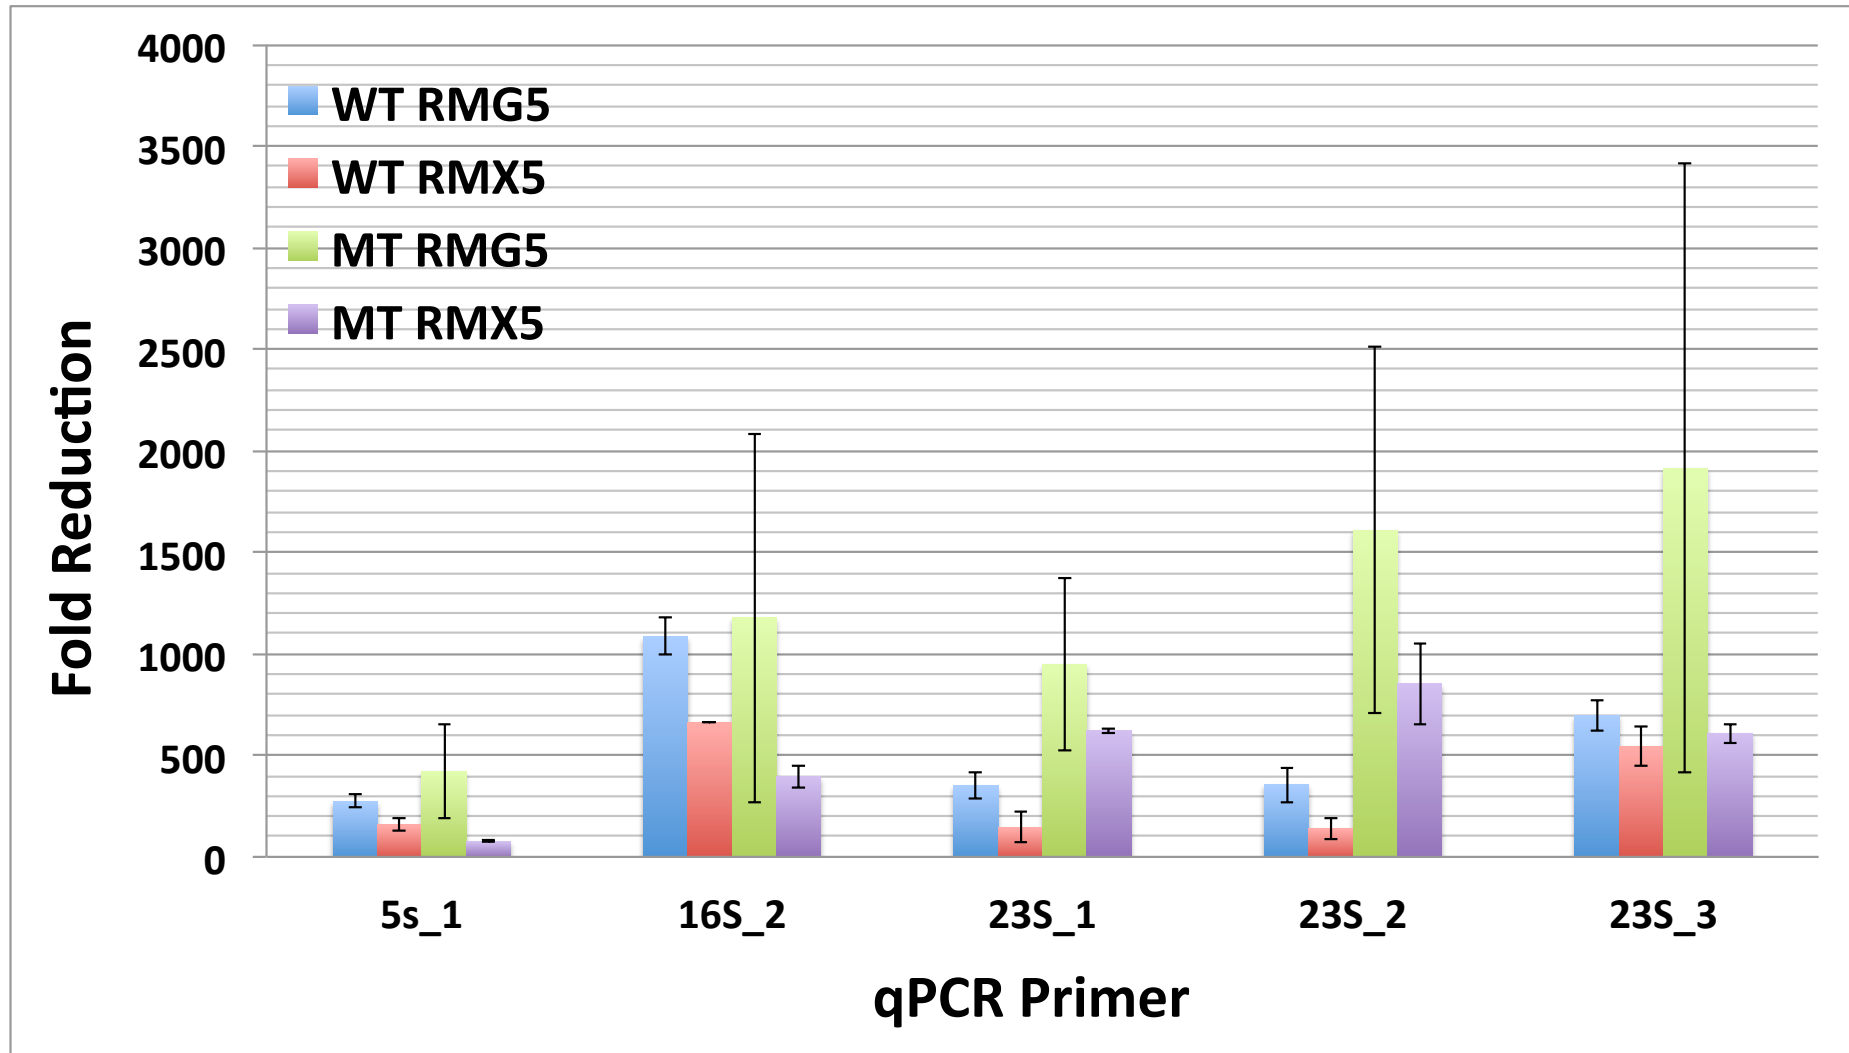

Fig. S2B

# Confirmation of rRNA depletion efficiency by RNA-Seq

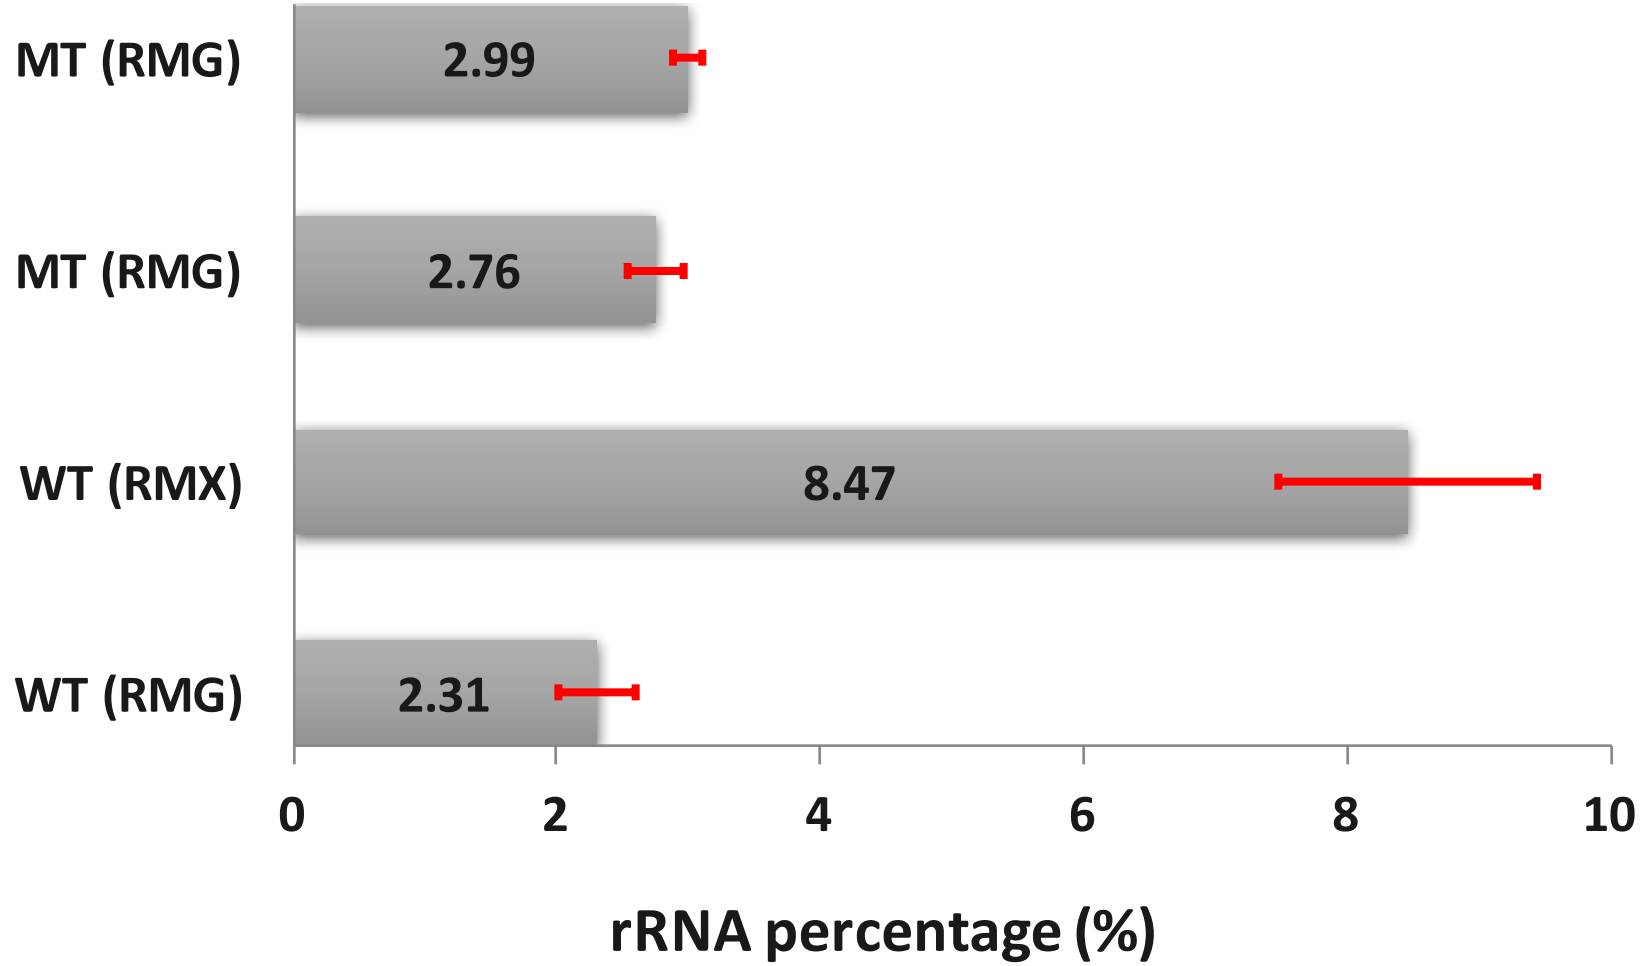

Fig. S2C

# Correlation between RNA-Seq replicates

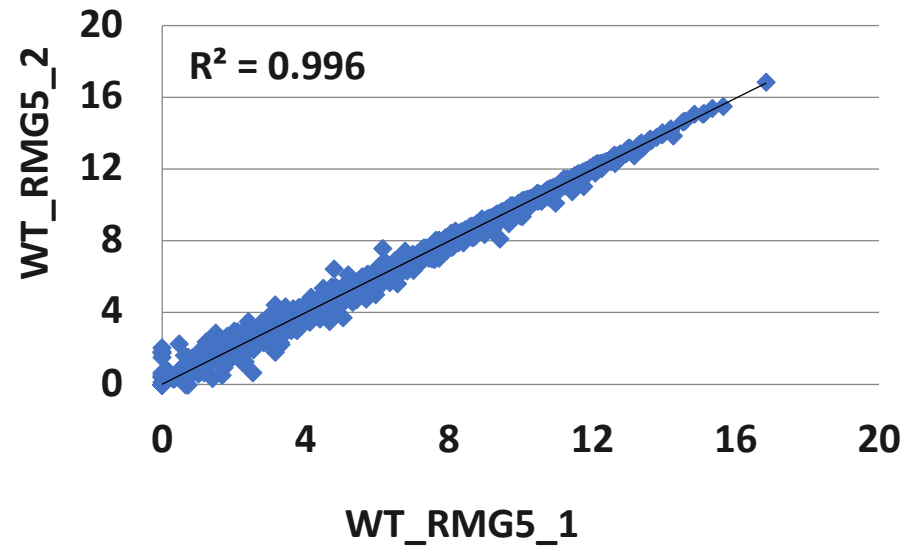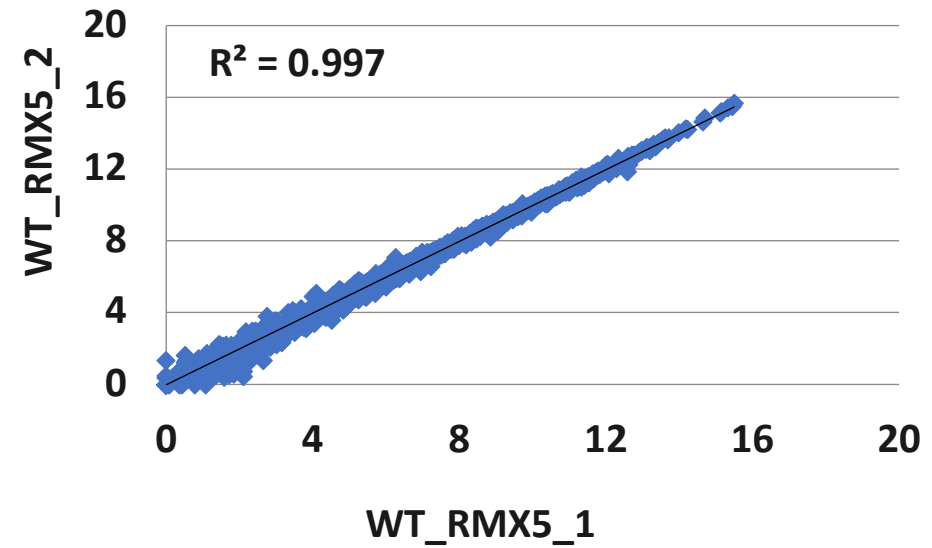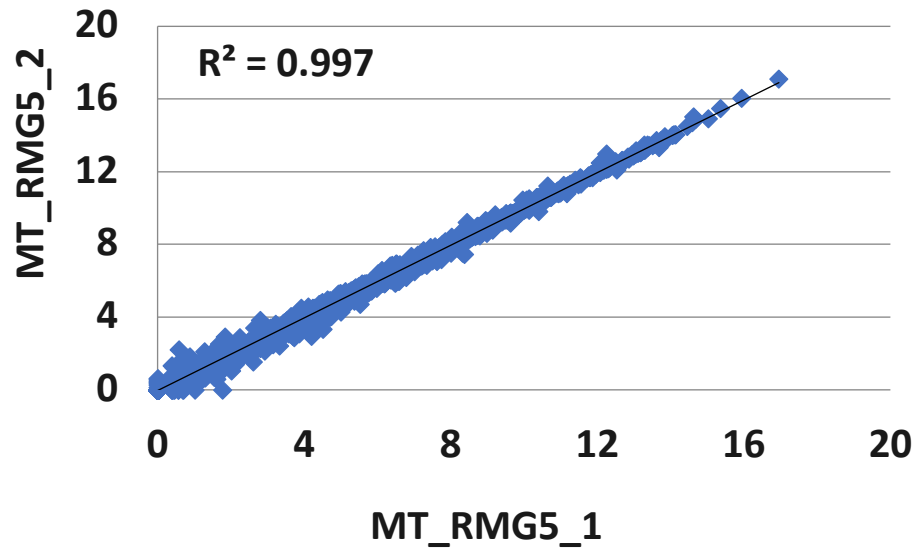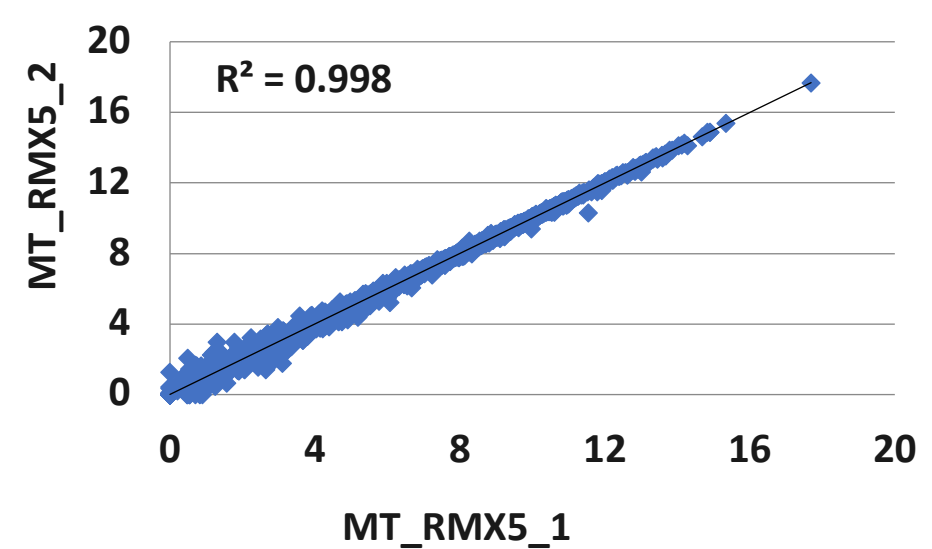

Fig. S2D

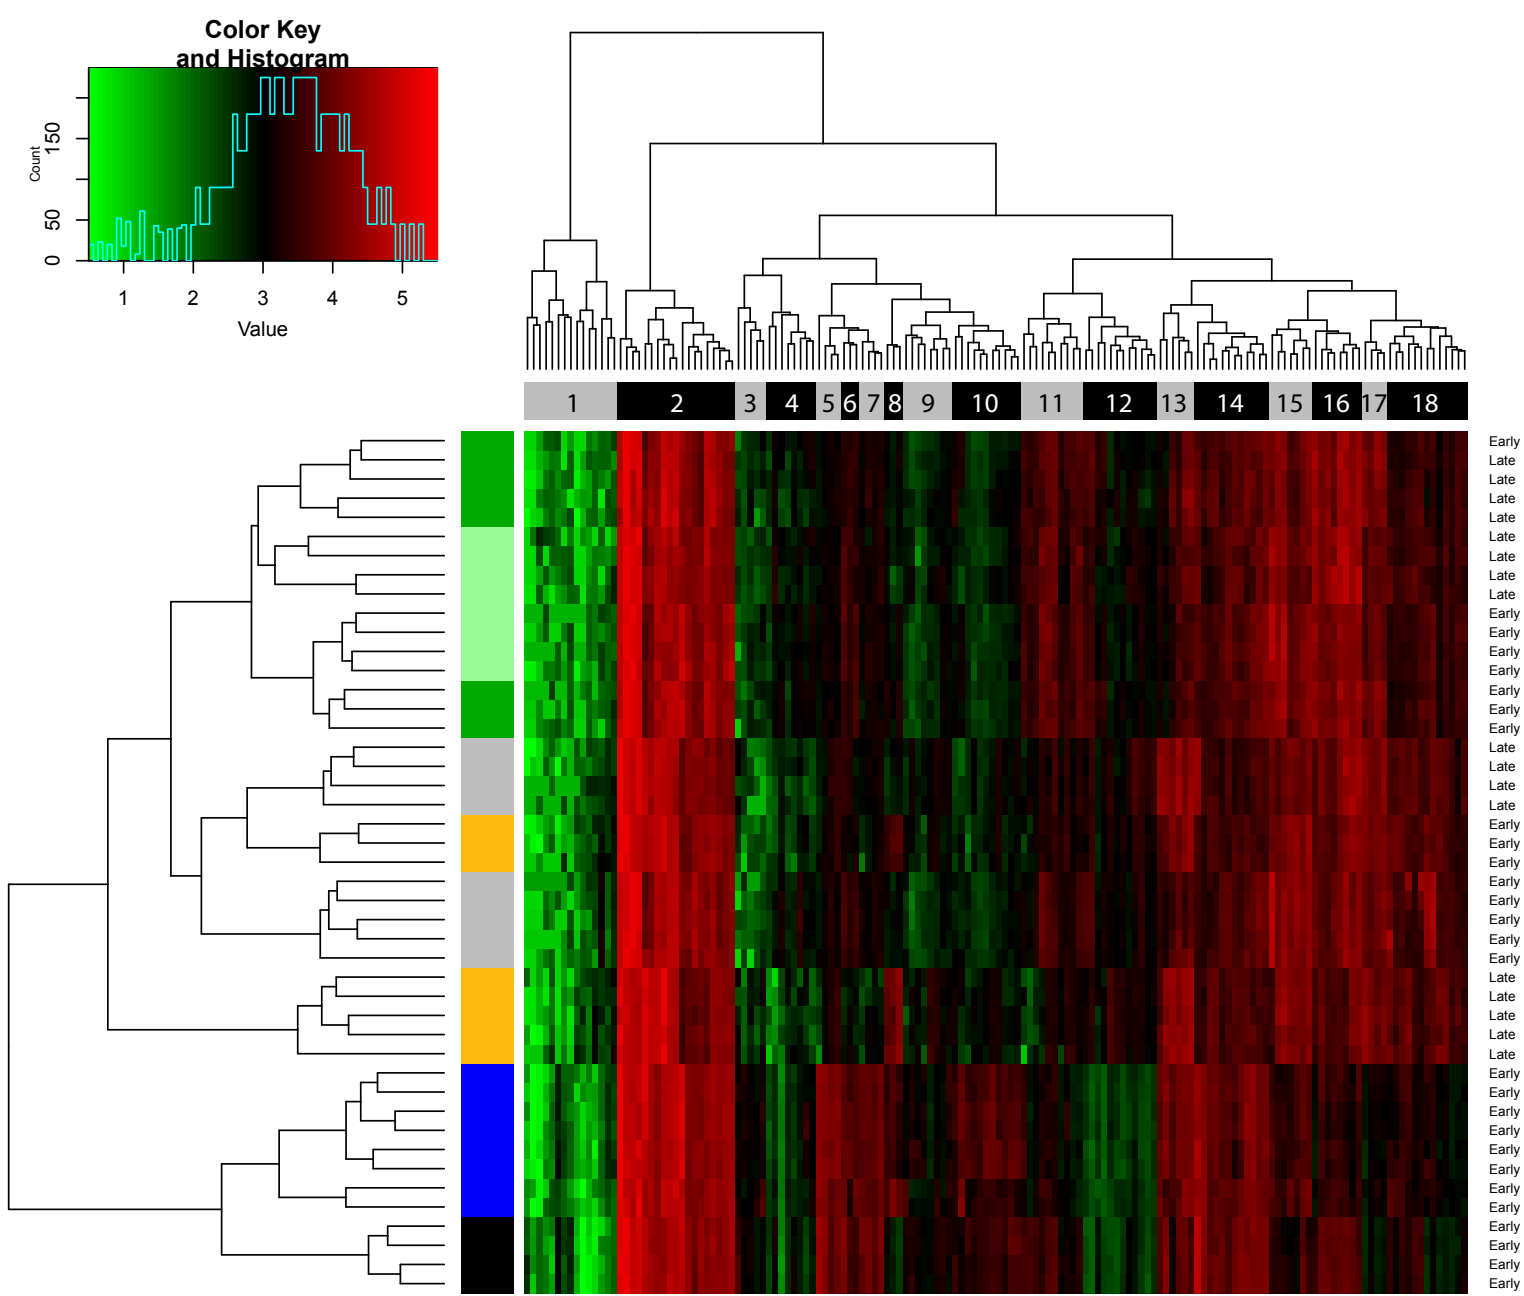

**Fig. S3**

*Z. mobilis* plasmid genes
