# Supplementary material for: Complete genome sequence and the expression pattern of plasmids of the model ethanologen Zymomonas mobilis ZM4 and its xylose-utilizing derivatives 8b and 2032
Source: Biotechnol Biofuels. 2018 May 2;11:125. doi: 10.1186/s13068-018-1116-x (PMC5930841; doi:10.1186/s13068-018-1116-x)
Supplement: Supplementary file 4 — Additional file 4: Table S3. RNA-Seq metadata. [file 13068_2018_1116_MOESM4_ESM.xlsx]

## Sheet: RNAseq information
Strain	ID	Media	Growth/Fermentation conditions	Growth Stage or OD	Samples collected by
ZM4	ANSTX	RMG	Anaerobic/microaerophilic batch culture with glucose 2% at OD 0.85	See OD	University of Asthens
ZM4	ANSUP	RMG	Anaerobic/microaerophilic batch culture with glucose 2% at OD 0.85	See OD	University of Asthens
ZM4	ANSTY	RMG	Anaerobic/microaerophilic batch culture with glucose 2% at OD 1.30	See OD	University of Asthens
ZM4	ANSUS	RMG	Anaerobic/microaerophilic batch culture with glucose 2% at OD 1.30	See OD	University of Asthens
ZM4	ANSTZ	RMG	Anaerobic/microaerophilic batch culture with glucose 2% at OD 1.44	See OD	University of Asthens
ZM4	ANSUT	RMG	Anaerobic/microaerophilic batch culture with glucose 2% at OD 1.44	See OD	University of Asthens
ZM4	ANSUA	RMG	Anaerobic/microaerophilic batch culture with glucose 2% at OD 1.52 (stationary 3.5 hrs)	Stationary	University of Asthens
ZM4	ANSUU	RMG	Anaerobic/microaerophilic batch culture with glucose 2% at OD 1.52 (stationary 3.5 hrs)	Stationary	University of Asthens
ZM4	ANSUC	RMG	Αerobic batch culture with glucose 2% at OD 0.98	See OD	University of Asthens
ZM4	ANSUX	RMG	Αerobic batch culture with glucose 2% at OD 0.98	See OD	University of Asthens
ZM4	ANSUG	RMG	Αerobic batch culture with glucose 2% at OD 1.30	See OD	University of Asthens
ZM4	ANSUY	RMG	Αerobic batch culture with glucose 2% at OD 1.30	See OD	University of Asthens
ZM4	ANSUH	RMG	Αerobic batch culture with glucose 2% at OD 1.54	See OD	University of Asthens
ZM4	ANSUZ	RMG	Αerobic batch culture with glucose 2% at OD 1.54	See OD	University of Asthens
ZM4	ANSUN	RMG	Αerobic batch, glucose 2% , OD 1.59 (stationary 3 hrs)	See OD	University of Asthens
ZM4	ANSWA	RMG	Αerobic batch, glucose 2% , OD 1.59 (stationary 3 hrs)	See OD	University of Asthens
2032	AGAAY	6% ACSH (corn stover hydrolysate)	Anaerobic in bioreactor	Mid-Glucose (mid-log)	GLBRC
2032	AGABB	6% ACSH (corn stover hydrolysate)	Anaerobic in bioreactor	Mid-Glucose (mid-log)	GLBRC
2032	AGABN	6% ACSH (corn stover hydrolysate)	Anaerobic in bioreactor	Mid-Glucose (mid-log)	GLBRC
2032	AGABX	6% ACSH (corn stover hydrolysate)	Anaerobic in bioreactor	Mid-Glucose (mid-log)	GLBRC
2032	AGABZ	6% ACSH (corn stover hydrolysate)	Anaerobic in bioreactor	Mid-Glucose (mid-log)	GLBRC
2032	AGABC	6% ACSH (corn stover hydrolysate)	Anaerobic in bioreactor	Mid-Xylose (mid-Stationary)	GLBRC
2032	AGABO	6% ACSH (corn stover hydrolysate)	Anaerobic in bioreactor	Mid-Xylose (mid-Stationary)	GLBRC
2032	AGABY	6% ACSH (corn stover hydrolysate)	Anaerobic in bioreactor	Mid-Xylose (mid-Stationary)	GLBRC
2032	AGACA	6% ACSH (corn stover hydrolysate)	Anaerobic in bioreactor	Mid-Xylose (mid-Stationary)	GLBRC
2032	AGABT	9% ACSH (corn stover hydrolysate)	Anaerobic in bioreactor	Mid-Glucose (mid-log)	GLBRC
2032	AGACG	9% ACSH (corn stover hydrolysate)	Anaerobic in bioreactor	Mid-Glucose (mid-log)	GLBRC
2032	AGACN	9% ACSH (corn stover hydrolysate)	Anaerobic in bioreactor	Mid-Glucose (mid-log)	GLBRC
2032	AGABU	9% ACSH (corn stover hydrolysate)	Anaerobic in bioreactor	Mid-Xylose (mid-Stationary)	GLBRC
2032	AGABW	9% ACSH (corn stover hydrolysate)	Anaerobic in bioreactor	Mid-Xylose (mid-Stationary)	GLBRC
2032	AGACC	9% ACSH (corn stover hydrolysate)	Anaerobic in bioreactor	Mid-Xylose (mid-Stationary)	GLBRC
2032	AGACH	9% ACSH (corn stover hydrolysate)	Anaerobic in bioreactor	Mid-Xylose (mid-Stationary)	GLBRC
2032	AGACO	9% ACSH (corn stover hydrolysate)	Anaerobic in bioreactor	Mid-Xylose (mid-Stationary)	GLBRC
8b-β21	NREL001	DCS (15% TS) (Deacetylated Corn stover (15% total solid loading)	Fermentor	32.5 h (log phase), rRNA-depleted	NREL
8b-β21	NREL002	DCS (15% TS) (Deacetylated Corn stover (15% total solid loading)	Fermentor	32.5 h (log phase), rRNA-depleted	NREL
8b-22C-β21	NREL003	DCS (15% TS) (Deacetylated Corn stover (15% total solid loading)	Fermentor	32.5 h (log phase), rRNA-depleted	NREL
8b-22C-β21	NREL004	DCS (15% TS) (Deacetylated Corn stover (15% total solid loading)	Fermentor	32.5 h (log phase), rRNA-depleted	NREL
8b-β21	NREL005	CS (15% TS) Non-Deacetylated Corn stover (15% total solid loading)	Fermentor	32.5 h (log phase), rRNA-depleted	NREL
8b-β21	NREL006	CS (15% TS) Non-Deacetylated Corn stover (15% total solid loading)	Fermentor	32.5 h (log , rRNA-depleted	NREL
8b-22C-β21	NREL007	CS (15% TS) Non-Deacetylated Corn stover (15% total solid loading)	Fermentor	32.5 h (log phase), rRNA-depleted	NREL
8b-22C-β21	NREL008	CS (15% TS) Non-Deacetylated Corn stover (15% total solid loading)	Fermentor	32.5 h (log phase), rRNA-depleted	NREL
8b-Sp	NREL009	RMG containg 5% glucose	Flask	18 h (log Phase), rRNA-depleted	NREL
8b-Sp	NREL010	RMG containg 5% glucose	Flask	18 h (log Phase), rRNA-depleted	NREL
8b-OEL22	NREL011	RMG containg 5% glucose	Flask	18 h (log Phase), rRNA-depleted	NREL
8b-OEL22	NREL012	RMG containg 5% glucose	Flask	18 h (log Phase), rRNA-depleted	NREL
