# Supplementary material for: Complete genome sequence and the expression pattern of plasmids of the model ethanologen Zymomonas mobilis ZM4 and its xylose-utilizing derivatives 8b and 2032
Source: Biotechnol Biofuels. 2018 May 2;11:125. doi: 10.1186/s13068-018-1116-x (PMC5930841; doi:10.1186/s13068-018-1116-x)
Supplement: Supplementary file 5 — Additional file 5: Table S4. Plasmid gene RNA-Seq counts. [file 13068_2018_1116_MOESM5_ESM.xlsx]

## Sheet: Table S4. RNAseq data_Counts an
	6_ACSH_G_AGAAY	6_ACSH_G_AGABB	6_ACSH_G_AGABN	6_ACSH_G_AGABX	6_ACSH_G_AGABZ	6_ACSH_X_AGABC	6_ACSH_X_AGABO	6_ACSH_X_AGABY	6_ACSH_X_AGACA	9_ACSH_G_AGABT	9_ACSH_G_AGACG	9_ACSH_G_AGACN	9_ACSH_X_AGABU	9_ACSH_X_AGABW	9_ACSH_X_AGACC	9_ACSH_X_AGACH	9_ACSH_X_AGACO	ZM4_AE_BA_EXL_1.30_0_A_ANSUG	ZM4_AE_BA_EXL_1.30_0_B_ANSUY	ZM4_AE_BA_EXM_0.98_0_A_ANSUC	ZM4_AE_BA_EXM_0.98_0_B_ANSUX	ZM4_AE_BA_STE_1.54_0_A_ANSUH	ZM4_AE_BA_STE_1.54_0_B_ANSUZ	ZM4_AE_BA_STL_1.59_0_A_ANSUN	ZM4_AE_BA_STL_1.59_0_B_ANSWA	ZM4_AN_BA_EXL_1.30_0_A_ANSTY	ZM4_AN_BA_EXL_1.30_0_B_ANSUS	ZM4_AN_BA_EXM_0.85_0_A_ANSTX	ZM4_AN_BA_EXM_0.85_0_B_ANSUP	ZM4_AN_BA_STE_1.44_0_A_ANSTZ	ZM4_AN_BA_STE_1.44_0_B_ANSUT	ZM4_AN_BA_STL_1.52_0_A_ANSUA	ZM4_AN_BA_STL_1.52_0_B_ANSUU	NREL001	NREL002	NREL003	NREL004	NREL005	NREL006	NREL007	NREL008	NREL009	NREL010	NREL011	NREL012
ZMOp32x001	13196	16078	14494	17821	16229	13687	13389	16704	19699	17934	18942	16616	7838	6091	8651	9590	8429	7811	7317	9823	12202	5441	4709	6041	5971	11085	19792	10451	13457	22341	15807	25164	16870	12705	14173	12809	9501	7656	7869	9487	9851	18988	22837	27128	24276
ZMOp32x002	895	876	732	920	840	380	282	332	345	553	573	642	991	1445	631	877	868	1628	1555	1609	1800	1776	1371	2073	1643	1316	1333	1524	1553	951	1682	1064	1629	132	144	205	153	148	148	119	113	148	137	103	126
ZMOp32x003	226	173	170	200	151	91	63	77	78	103	120	152	294	363	195	225	221	220	213	221	295	293	247	315	281	305	228	235	214	155	299	223	312	43	58	47	37	37	42	40	33	51	45	28	38
ZMOp32x004	3548	3115	3364	3938	2691	1523	1312	1796	1717	1857	1531	1648	3462	5741	2276	2885	2937	3450	4295	4051	4756	2794	3804	3654	4543	5930	5094	5681	4750	2587	5396	2895	5230	288	328	341	365	396	368	268	269	316	335	191	143
ZMOp32x005	1099	934	959	1184	1177	849	726	916	1006	1114	1161	1000	836	1006	557	836	1081	321	480	301	546	254	358	268	339	489	444	417	473	399	524	384	562	166	147	371	400	131	119	132	131	104	100	73	80
ZMOp32x006	2092	2528	2583	2783	2339	4266	3665	4762	5604	4784	4514	4918	2786	3528	3181	3776	4334	962	797	1138	894	998	650	1409	1108	1377	1774	1320	1223	2100	1401	2401	1387	1628	1546	1613	1431	1112	1178	1417	1513	1223	1177	1504	1436
ZMOp32x007	974	1047	814	1045	1084	7456	8971	6489	5678	1617	1489	1473	1132	913	1664	1102	1354	407	350	520	361	404	241	565	465	613	522	388	371	716	438	933	529	1366	1598	2074	1317	991	1033	1615	1704	1172	1375	1547	1603
ZMOp32x008	2692	1921	1901	2114	1919	4275	4032	4210	4119	8497	6930	7753	9929	11786	9932	12236	12371	2806	2114	2475	1685	4516	3321	6995	8762	1646	1545	1521	1635	3522	2551	4401	4822	4111	4281	6954	6959	4634	4476	6301	5196	4380	5133	4127	4146
ZMOp32x009	5161	3290	2963	3585	3248	9402	8845	8620	9069	15507	14501	14996	18645	24144	16089	21867	22928	5999	4054	5247	3063	11257	6736	17901	17430	3896	3153	2822	2681	5389	5547	6701	8221	3994	4550	9600	9708	4288	4061	5556	4481	2664	2506	2757	2654
ZMOp32x010	978	954	857	1078	933	1008	934	1438	1668	2394	2718	2635	1216	1161	560	1378	1217	446	385	524	471	501	469	667	621	629	777	694	597	807	744	898	725	603	437	763	861	315	318	416	473	258	253	263	282
ZMOp32x011	9809	8830	7571	8556	9641	43166	43792	40135	36923	17108	20619	17764	14702	9383	20872	11945	11289	5620	3892	6023	4104	8219	4241	13628	6741	5717	7167	5461	4686	8752	8011	11530	9567	11750	18218	15153	17504	11599	13443	17611	13763	19071	26024	19938	18792
ZMOp32x012	28	40	35	28	24	36	25	29	51	278	240	316	498	252	313	556	528	22	42	26	59	24	24	20	17	24	27	27	39	8	17	6	16	137	144	640	533	158	157	198	176	25	37	25	26
ZMOp32x013	47	90	57	90	73	91	44	52	92	477	364	513	1022	1194	1048	1275	1558	78	141	122	198	70	85	49	57	96	100	104	89	15	47	15	47	137	139	412	358	161	152	195	158	22	27	19	20
ZMOp32x014	4	2	2	3	5	3	3	6	5	4	5	7	7	8	8	15	26	3	5	2	1	2	2	2	3	1	2	1	3	1	3	2	4	3	4	6	7	4	5	4	2	1	1	1	2
ZMOp32x015	30	35	33	82	73	17	25	17	36	166	151	182	428	368	317	531	613	56	102	82	105	42	45	32	28	63	51	59	68	37	59	39	57	156	162	225	192	146	149	124	127	51	50	70	90
ZMOp32x016	355	532	499	688	581	390	315	441	400	710	573	675	910	881	793	1135	1047	248	443	319	718	171	337	153	203	334	527	357	423	224	298	275	304	135	144	225	181	103	101	113	125	161	163	127	117
ZMOp32x017	26	33	28	37	20	84	60	80	84	97	109	109	238	171	202	243	306	18	12	24	43	28	29	42	55	25	19	33	46	69	25	55	36	40	47	63	50	35	35	46	45	57	84	66	66
ZMOp32x018	409	443	384	511	410	317	260	321	341	329	260	282	310	405	288	357	358	230	139	268	195	183	158	229	182	219	215	262	216	318	202	255	230	72	64	106	95	56	54	64	62	39	51	50	47
ZMOp32x019	4	1	2	3	5	5	8	3	7	13	10	8	18	11	15	11	34	1	1	1	1	1	1	1	1	1	2	1	1	3	1	1	1	3	3	2	2	2	3	3	4	1	2	1	1
ZMOp32x020	3397	3313	2988	3714	3536	1726	1449	1492	1979	3230	3869	3177	2175	2798	2147	2144	1933	2877	2992	2823	2435	4107	3219	5850	6561	1576	1669	1656	1425	1820	2767	1883	3605	2576	2789	5069	5443	2733	2816	3122	3194	2632	3062	3171	2702
ZMOp32x021	4412	4048	4043	5125	4171	3583	2734	3302	3678	4609	4405	3841	4086	4672	4182	3500	4325	3342	3478	3874	2893	5333	4595	7664	7362	2712	2956	2189	1769	2032	2945	2211	3267	2891	3203	4511	4724	3346	3518	4154	3815	4224	4743	3728	3447
ZMOp32x022	13712	14292	16247	17164	15155	32081	30192	33228	34638	27586	26612	24082	25995	24573	28009	27456	31995	8262	8473	10561	10982	7657	7932	11274	13545	10734	14842	9624	11394	18572	15133	20260	15291	4513	5840	5463	4840	4314	4558	5434	5046	7231	8377	8030	7026
ZMOp32x023	15312	16118	17409	19547	17094	9637	9913	10636	10959	12669	12986	10155	5823	4747	5764	5858	6862	11040	9150	16630	14158	7020	6875	6918	7045	12380	18154	15035	17560	11334	17398	11402	9969	5842	5919	5745	5378	4604	5026	5287	5449	8160	10030	10679	9151
ZMOp32x024	11	2	9	12	29	9	14	37	20	14	21	23	19	14	16	44	26	5	3	5	6	2	9	3	7	4	7	5	4	4	3	5	3	7	7	4	4	5	5	7	8	1	1	2	3
ZMOp32x025	12603	17221	15969	21270	17006	7274	5547	8150	11209	14970	14392	13725	10049	10928	7214	8614	11681	4978	5837	5962	8741	3016	4560	2403	3278	7373	9695	6414	7646	4771	6649	3932	4831	3375	2115	1927	1989	2190	2191	2110	2535	732	717	966	828
ZMOp32x026	9	4	11	7	10	7	5	11	6	16	16	13	23	39	20	33	43	1	2	1	1	1	2	3	3	1	2	1	3	1	1	1	3	3	4	3	2	2	2	5	4	0	1	1	1
ZMOp32x027	9	44	19	28	39	20	22	60	23	73	62	28	83	139	114	88	145	5	1	2	6	8	6	10	14	5	5	2	4	9	6	11	1	5	5	4	9	6	9	11	7	2	2	2	3
ZMOp32x028	4103	5525	5711	7538	5651	939	726	1091	1247	2728	2812	2042	1098	1449	806	932	1269	792	1125	976	1923	355	905	147	432	1316	1706	1144	1608	1294	1716	829	1051	848	286	274	445	449	468	442	604	86	96	142	92
ZMOp32x029	48.5	45.5	61	50	61	15	23.5	34.5	11.5	49	62.5	49.5	31	44	27.5	42	68	7.5	3	7.5	13.5	4.5	3	3.5	8	4	10.5	8	16.5	11.5	3.5	14.5	3.5	28	16.5	7	8.5	12	15	16	19.5	6.5	4.5	5.5	5.5
ZMOp33x001	1473	1251	1281	1323	1328	1786	1737	1323	1316	573	776	811	171	220	297	192	204	2111	1326	1812	1308	2868	1541	3794	2431	1144	1032	1106	805	3693	3697	4165	2999	119	116	154	140	77	87	105	111	453	460	375	389
ZMOp33x002	2574	2675	2851	2723	2486	4287	4254	3643	3468	1674	2124	2112	1355	2063	1836	1621	1507	4955	3882	4070	3732	5699	4346	8693	8084	2949	3495	2428	2273	8852	4310	9326	5435	345	296	336	356	367	341	525	486	579	625	424	394
ZMOp33x003	108	110	107	143	122	85	47	60	54	109	125	137	48	59	49	52	34	165	152	177	184	108	140	162	133	148	137	141	126	60	145	64	101	44	43	74	62	44	37	44	45	72	86	50	47
ZMOp33x004	3238	3274	2906	3289	2916	2317	1780	1893	2251	4237	3384	4473	2768	3220	1761	2299	2588	3984	3305	3836	3659	3080	3529	3838	3439	3389	3449	3364	3067	791	3712	970	1717	575	582	1168	1267	537	521	461	477	395	392	292	258
ZMOp33x005	1423	1279	1082	988	1079	1136	1227	936	810	1346	1770	1066	442	405	426	494	366	3553	2838	2993	2552	4873	3083	6206	4664	2117	2012	2458	1943	3065	3911	3213	3822	753	794	2242	2155	1267	1138	1274	1139	1127	1154	1070	1030
ZMOp33x006	1862	1362	1287	1391	1094	1221	1526	1128	941	2237	2124	1861	2268	1991	1712	2236	1882	2644	2389	2153	2040	3794	3051	4242	3883	1556	1740	1946	1600	2764	2849	3072	2727	1450	1646	3084	2951	2519	2327	2792	2512	2051	2247	1767	1709
ZMOp33x007	4	6	9	1	10	2	3	3	4	3	5	3	4	1	1	4	9	2	2	2	7	3	3	1	8	8	2	7	6	3	4	8	3	8	6	4	3	10	6	8	8	15	23	20	23
ZMOp33x008	740	1157	1051	1057	864	386	499	455	408	339	333	264	220	271	212	217	238	1659	1241	1786	1808	921	1090	982	944	1960	1760	2061	1452	930	3800	1092	947	173	198	111	109	119	124	129	124	431	515	403	402
ZMOp33x009	181	236	214	222	195	517	496	690	683	335	292	317	326	448	348	365	324	236	251	174	270	271	233	419	529	175	174	102	147	927	264	1087	334	153	176	138	113	112	112	152	158	333	385	385	349
ZMOp33x010	731	956	926	918	747	3110	3167	2706	2954	1271	1296	1489	1007	980	1002	1068	1047	947	695	943	861	1253	862	1595	1741	891	877	816	706	2623	1410	3160	1499	482	531	510	374	387	414	480	493	949	1096	1206	914
ZMOp33x011	1729	1454	1391	1451	1411	2228	2219	2145	2091	1740	1859	2027	1274	1385	1074	1238	1235	6379	4393	5991	3352	7367	6225	7426	9773	3713	2532	3379	2225	7906	6735	9504	7267	629	782	909	756	524	497	640	674	2522	2402	1852	1991
ZMOp33x012	4163	3584	4454	4228	3555	4182	4788	4361	4333	2566	2624	2857	1242	1514	1196	1481	1515	9211	8438	8820	6504	10143	11584	9820	16226	7939	6042	6012	4581	12798	15022	12501	13275	791	833	754	800	589	576	737	825	2202	2233	1897	1729
ZMOp33x013	439	374	444	354	273	351	433	381	327	203	271	284	146	201	157	147	204	955	908	961	655	1089	1104	992	1529	775	546	536	414	1184	1120	1002	1070	174	173	152	142	153	137	191	190	595	667	501	501
ZMOp33x014	30	32	55	31	44	64	68	40	44	19	36	39	12	15	13	15	34	139	139	125	94	111	111	84	168	111	81	106	82	200	186	184	209	38	37	32	28	31	23	39	38	179	230	174	173
ZMOp33x015	5558	3928	4621	3658	2901	8854	11097	8336	7284	5188	5556	5533	4262	3762	3971	3898	3133	6353	5786	6592	4933	7202	6635	10403	12037	6769	5929	5264	4405	12425	11278	13443	9926	402	518	578	410	399	430	548	478	2188	2444	1947	1902
ZMOp33x016	1032	1083	1244	1058	1016	2577	2832	2474	2543	1271	1265	1242	1216	1656	1468	1330	1158	2437	2496	2282	2214	2119	2527	2560	4002	2123	2086	1749	1593	2270	2916	2300	2275	518	563	425	408	475	482	675	673	1486	1552	1204	1154
ZMOp33x017	204	221	254	203	220	370	507	344	361	196	177	201	188	273	299	258	196	304	391	291	327	246	357	195	317	388	400	261	235	195	456	176	216	67	76	57	59	52	55	75	65	121	116	102	99
ZMOp33x018	1024	1032	1247	1248	991	1965	2268	2211	2153	1609	1614	1787	1885	2481	1866	1964	2256	1355	1515	1529	1676	1382	1521	1672	1736	1514	1882	1198	1100	1544	2098	1421	1141	234	196	197	197	209	198	268	299	207	204	188	168
ZMOp33x019	2707	2149	2897	2596	2051	1032	1115	1068	1223	1261	1546	1323	804	902	758	829	673	6697	5046	6622	3913	7335	7279	7207	12567	6061	3599	4777	3040	7009	8354	6381	6712	143	134	156	165	139	138	181	199	558	539	461	373
ZMOp33x020	1522	1593	1706	1805	1651	717	668	911	809	1201	1260	1051	697	862	555	685	681	2029	1777	1710	1585	1883	2181	1384	1827	1242	1186	1100	1071	1219	1191	853	898	56	42	56	70	72	55	64	78	35	35	46	44
ZMOp33x021	2688	2907	3185	3207	2530	2709	2761	2764	2936	2932	3056	2981	1806	1903	1390	1713	1933	6878	5908	5172	4877	6070	7658	4458	4655	3203	3015	2760	2420	1728	3322	1731	1591	356	236	346	547	363	333	409	449	144	124	131	113
ZMOp33x022	2084	2189	2323	2492	2134	4702	3808	4061	3599	2910	3416	3133	4085	6032	4913	4395	4402	2255	2694	1363	2150	2924	4141	3362	6168	812	959	701	939	1109	1011	1020	761	111	101	142	153	155	141	177	182	99	92	97	88
ZMOp33x023	2589	3355	4325	4347	3541	5815	4999	5736	5379	2626	2983	3077	2328	3420	2975	2432	2316	3247	3529	2133	3270	3594	5160	2928	5293	1396	1415	1112	1502	2061	2363	1914	1642	295	201	211	264	274	258	347	386	205	185	176	146
ZMOp33x024	71	80	90	93	103	49	96	77	64	107	89	84	208	232	216	214	281	84	84	94	113	104	107	169	151	57	66	46	51	37	48	51	18	30	28	47	46	37	42	39	45	19	19	17	18
ZMOp33x025	424	567	562	585	508	100	131	132	132	158	156	87	83	154	105	85	136	599	459	585	473	504	474	346	321	288	250	285	287	246	261	219	157	37	21	33	33	36	38	39	39	18	24	23	17
ZMOp33x026	316	255	257	260	225	151	186	206	155	291	349	276	428	369	329	354	434	403	381	290	292	424	390	370	449	250	348	324	189	484	298	612	562	191	217	443	401	301	301	409	376	805	1213	943	831
ZMOp33x027	282	236	243	251	234	98	99	95	110	301	401	327	341	292	235	343	298	430	394	311	319	410	332	371	454	242	260	283	223	530	287	623	586	94	99	252	229	144	130	183	177	460	577	420	428
ZMOp33x028	436	615	772	691	532	540	419	521	485	342	307	367	327	414	309	225	358	1229	1411	892	1182	757	1229	498	634	578	601	604	684	211	398	221	742	58	56	64	69	58	57	74	87	101	113	88	82
ZMOp33x029	43	43	58	52	39	34	30	40	33	37	31	30	63	24	32	52	43	145	152	114	131	142	125	92	76	49	35	53	49	29	41	27	114	28	23	16	12	25	22	20	19	57	52	38	44
ZMOp33x030	146	131	117	130	137	170	181	158	196	218	286	333	232	171	133	206	213	400	318	300	311	277	288	145	137	143	128	192	207	70	85	69	149	119	118	98	84	184	183	95	93	110	135	97	86
ZMOp33x031	18468	12712	12693	12217	12884	16235	18561	18216	17805	16806	17391	17538	10589	9826	8844	10132	9655	23735	16434	22920	17664	35955	22256	47868	40237	15736	18684	18444	15162	16353	24468	19407	15961	7159	8624	11388	9687	5399	5385	6223	6265	24914	24453	26967	28628
ZMOp33x032	11	9	13	19	20	8	5	6	8	7	16	9	4	14	5	11	9	13	15	9	19	18	5	16	15	4	12	11	11	10	13	10	4	17	10	16	15	8	13	13	14	11	12	13	13
ZMOp33x033	3460	1598	1436	1270	1079	14960	19966	13689	11084	7144	4910	5631	20638	25149	26521	22161	25414	887	924	1077	1227	1678	1121	4893	3825	737	1331	778	1309	2581	1274	3504	1289	6861	8191	6349	5847	11192	10684	16303	14991	8602	10907	12021	11513
ZMOp33x034	37	24	22	31	15	12	5	9	16	10	16	8	4	3	4	4	17	37	24	36	35	42	27	52	28	27	41	29	24	113	113	77	43	22	15	20	24	16	14	18	17	36	40	54	63
ZMOp33x035	157	180	172	191	137	61	60	77	75	103	62	102	46	43	26	41	68	299	209	395	241	259	236	315	225	191	211	223	233	312	226	354	184	95	82	119	124	83	87	93	85	235	241	253	260
ZMOp33x036	888	255	236	213	259	889	1068	822	753	1032	1140	936	1418	1211	899	1798	1481	700	348	463	251	1114	459	2214	938	274	220	275	193	594	353	957	644	547	582	1142	1134	483	475	718	642	483	567	533	437
ZMOp33x037	1333	571	603	655	435	2147	2769	2168	1968	1881	1729	1865	2793	2730	2121	2881	3125	927	686	783	581	1486	1057	2830	2463	399	306	396	316	733	541	955	826	755	709	1044	1156	645	655	813	702	336	331	336	238
ZMOp33x038	542	279	329	285	264	1170	1397	1111	1059	969	870	887	1579	1755	1324	1632	2111	292	163	208	117	498	275	859	647	179	106	148	99	284	172	258	278	311	316	217	275	260	280	339	313	103	106	113	86
ZMOp33x039	303	310	301	317	313	64	96	86	95	107	89	84	118	124	96	125	179	585	367	575	321	526	369	456	330	759	638	626	404	525	593	545	711	97	118	144	137	101	93	98	87	273	219	210	192
ZMOp33x040	174	193	186	211	176	90	115	89	84	84	89	100	160	196	178	177	306	420	268	400	215	438	316	402	313	422	454	391	351	572	438	691	574	63	60	67	62	41	47	55	49	127	113	96	109
ZMOp36x001	73	71	76	54	68	126	107	72	106	44	36	58	48	78	69	59	68	37	23	38	35	72	42	70	77	52	35	42	39	61	48	66	40	374	315	260	215	334	344	306	377	196	172	262	251
ZMOp36x002	15	31	33	28	15	88	90	66	79	20	26	46	40	63	53	70	34	22	28	32	32	24	26	35	33	26	25	13	33	23	20	16	9	205	146	86	61	169	169	146	186	93	98	94	103
ZMOp36x003	13	9	8	7	29	32	22	17	36	13	5	10	23	16	16	15	26	13	2	9	12	11	9	6	10	12	10	10	11	8	8	10	10	123	88	64	41	119	106	110	128	65	71	71	88
ZMOp36x004	166	209	156	169	132	108	85	92	118	47	16	55	40	49	57	55	43	120	58	113	55	124	74	91	82	83	106	103	118	223	124	224	149	552	427	587	623	506	493	546	607	770	753	988	975
ZMOp36x005	275	317	269	282	278	255	244	289	290	255	281	227	118	113	136	81	196	283	128	322	152	378	204	353	406	266	230	274	314	506	312	568	379	1590	1406	1292	1272	1118	1060	1168	1431	1755	2078	2555	2427
ZMOp36x006	135	124	90	112	151	387	315	369	441	407	333	466	282	283	336	295	375	81	48	89	65	166	102	263	188	67	84	70	117	175	52	170	61	1081	1287	604	372	514	575	505	567	578	583	781	829
ZMOp36x007	17	21	19	28	20	60	60	89	65	72	83	66	100	113	85	122	170	17	23	15	30	19	21	22	27	13	17	22	31	18	4	24	8	256	315	100	72	136	163	111	125	155	160	214	205
ZMOp36x008	690	831	704	738	791	1384	1430	1435	1545	1671	1437	1727	1878	1776	1907	1658	1481	522	417	636	509	700	538	1024	767	498	642	502	715	884	557	993	449	7599	8207	5068	3807	5911	6402	6177	6234	4659	5036	6341	5724
ZMOp36x009	200	283	280	314	269	177	151	263	235	169	151	187	181	261	219	214	213	132	102	106	176	117	112	107	114	97	95	113	160	116	103	149	87	1302	986	549	486	1082	1023	822	910	539	568	625	577
ZMOp36x010	47	54	77	97	93	46	41	46	54	24	21	20	63	81	74	55	51	36	34	49	40	34	26	42	29	40	34	39	67	47	34	51	25	556	437	143	168	357	464	253	241	236	246	439	350
ZMOp36x011	131	195	247	306	234	200	126	203	238	200	234	195	139	221	198	173	162	136	128	179	194	191	183	182	203	145	96	143	257	267	213	299	218	1688	1312	871	622	946	1116	640	706	1097	995	1852	1564
ZMOp36x012	90	93	104	190	78	175	118	146	188	89	89	111	88	137	115	88	85	61	56	66	82	94	104	97	136	95	66	80	128	182	112	175	155	696	578	202	183	444	495	324	328	422	381	754	639
ZMOp36x013	209	245	235	300	239	155	178	172	196	99	62	110	62	110	79	70	128	181	154	204	198	261	221	197	313	222	167	221	226	286	314	288	369	516	502	154	151	349	375	218	238	314	273	401	358
ZMOp36x014	2	1	2	4	5	1	3	3	4	1	5	2	2	1	1	4	9	4	1	5	3	1	2	2	2	1	2	4	4	2	3	3	3	29	25	7	9	14	20	20	19	32	33	32	28
ZMOp36x015	933	1202	1022	1135	1270	780	605	862	962	696	719	748	438	664	571	468	545	752	659	890	831	800	766	693	851	799	902	891	1095	1057	867	1047	743	3581	3030	2503	2280	2612	2535	2277	2605	3006	3101	4005	3541
ZMOp36x016	112	79	77	81	73	77	44	66	81	64	109	70	48	58	40	66	17	78	72	83	75	58	71	57	67	101	76	110	111	108	85	75	83	2342	1806	2021	2658	2110	2044	2306	2448	4465	4689	3987	3816
ZMOp36x017	221	309	296	290	357	127	140	183	187	292	354	255	201	182	175	243	238	233	179	256	280	200	190	195	133	257	316	323	347	286	271	286	227	3458	2316	3169	3615	3181	2922	3164	3540	3798	4030	4825	4657
ZMOp36x018	202	313	287	309	317	2359	2279	2093	2047	424	380	402	241	221	194	247	204	443	245	408	392	793	527	796	1082	583	481	532	623	979	599	1149	490	2754	3466	2851	1329	1316	1460	1991	2137	4358	5914	6871	6561
ZMOp36x019	54	70	66	73	78	82	55	57	75	39	42	43	26	54	64	26	77	85	75	87	69	122	68	168	77	67	86	139	126	57	75	69	19	277	236	272	246	273	260	270	267	538	661	498	472
ZMOp36x020	187	220	186	187	176	248	236	269	305	166	172	170	143	220	257	265	255	268	169	269	244	239	167	316	194	252	338	355	365	128	302	162	83	999	838	1254	1344	808	837	788	889	940	1250	1478	1490
ZMOp36x021	13	7	11	6	10	117	115	100	133	90	47	77	95	57	90	55	60	9	5	14	10	12	9	32	23	4	19	10	12	104	24	120	39	196	254	80	44	133	158	155	150	197	174	134	170
ZMOp36x022	2	5	6	4	5	12	3	17	6	10	16	11	32	40	23	37	43	15	7	20	19	20	10	28	33	24	10	27	26	8	11	12	4	55	60	52	52	66	57	60	65	57	76	72	66
ZMOp36x023	41	28	35	24	34	14	14	11	11	19	16	30	56	77	69	41	60	50	33	47	45	69	51	131	151	36	24	24	40	17	24	20	31	92	88	85	92	141	125	108	90	127	149	70	79
ZMOp36x024	701	431	362	396	313	150	121	109	160	414	484	344	384	366	363	335	272	545	324	476	292	829	459	1419	1143	351	385	458	271	149	227	199	318	673	657	727	816	1386	1373	699	753	766	992	456	460
ZMOp36x025	2632	3356	3736	3868	3067	616	614	725	714	745	833	535	169	254	189	203	170	2098	2529	2699	3428	1355	2049	892	911	4083	4981	3145	3887	2732	6409	2359	3497	681	606	669	970	619	598	498	547	709	609	729	708
ZMOp36x026	2	1	2	1	5	1	3	3	1	1	5	2	2	1	2	11	9	1	1	1	1	1	1	1	1	1	2	1	1	1	1	1	1	1	2	2	2	1	3	2	2	9	14	5	6
ZMOp36x027	849	1207	1002	1109	962	461	477	636	570	332	318	255	84	113	126	144	179	560	610	858	782	418	370	429	333	963	1512	974	1354	1150	1472	1229	900	1103	1136	1445	1223	876	909	837	945	2401	3136	4284	3750
ZMOp36x028	402	506	424	567	552	388	178	243	269	253	266	314	185	218	410	203	281	599	408	670	565	638	337	554	326	600	807	691	649	247	661	203	283	945	840	837	799	887	877	858	901	591	631	823	968
ZMOp36x029	1628	1835	1599	1823	1661	1542	1123	1297	1336	1506	1385	1337	1589	1736	2176	1735	1771	2545	1904	3308	2646	2126	1757	2683	2312	2791	3498	3106	3533	1782	2685	1842	2251	2945	2620	3525	3376	3187	3265	3217	3342	2285	2589	3036	2991
ZMOp36x030	1466	1449	1244	1324	1494	768	583	653	739	1113	1119	1061	961	1421	1460	1050	1226	2083	1516	2354	1858	1605	1015	2085	1435	2307	2890	2683	2882	1166	1641	1197	1491	2229	2040	4222	3717	2274	2329	1952	2178	1778	2107	2927	2514
ZMOp36x031	1189	2061	1755	1983	1592	2126	2024	1847	1733	1005	843	889	820	654	734	807	868	2498	2148	3098	2536	2279	2282	3164	3891	2541	3071	3025	3584	1662	1985	2022	1417	921	1056	1166	1089	1077	1036	1528	1480	2417	2702	2363	2222
ZMOp36x032	1355	1667	1386	1474	1284	1462	1123	1017	1293	1456	1583	1295	1249	1312	1129	1234	1030	2256	1569	2195	1699	3500	1951	5880	4098	1472	1495	1719	1668	913	1589	1064	1274	1244	1293	2652	2789	1609	1544	1862	1831	1210	1373	1881	1443
ZMOp36x033	54	26	32	40	39	8	16	23	9	42	57	67	65	38	31	74	43	143	82	75	53	114	96	34	23	69	66	95	87	9	23	11	34	301	344	1057	583	431	419	400	340	91	90	87	102
ZMOp36x034	28	8	17	13	10	5	3	3	7	16	10	20	56	30	27	81	77	50	20	17	13	31	22	9	6	47	37	20	18	8	13	11	17	92	102	265	166	106	114	90	88	59	57	49	49
ZMOp36x035	9	7	11	10	5	3	3	9	7	7	16	18	35	22	14	37	34	20	20	20	7	19	10	5	3	22	14	20	15	5	11	7	17	59	71	131	81	59	60	45	43	43	41	38	36
ZMOp36x036	206	348	353	357	342	58	41	77	75	147	99	166	121	148	85	107	187	591	468	413	481	472	558	151	238	514	669	439	512	197	356	194	629	515	467	719	670	416	425	344	414	263	251	283	277
ZMOp36x037	436	621	627	611	498	87	99	126	139	261	312	185	116	104	71	107	145	517	749	785	1048	337	460	321	265	675	983	667	996	348	687	331	255	621	613	933	1036	572	523	547	576	419	436	432	433
ZMOp36x038	2608	3427	3114	3325	3165	1384	1890	1916	1804	1962	1588	1375	989	816	611	851	817	7108	6184	9645	10262	5705	4921	5904	5083	7660	15124	9853	14667	3708	7601	3772	3235	15233	14386	12062	9838	12720	13275	13042	12938	9924	14775	19665	17046
ZMOp36x039	1114	1717	1522	1841	1509	594	657	570	597	677	500	527	635	584	409	453	383	2092	2112	2499	2516	2116	2220	2711	2745	2482	3017	2671	3135	928	2209	1062	1260	1273	1578	1048	793	1008	1106	1211	971	1832	1997	1664	1657
ZMOp36x040	60	103	77	94	63	38	49	34	23	46	36	13	40	22	23	26	9	203	195	233	285	171	233	170	224	209	211	261	275	168	215	212	199	167	192	87	79	124	124	116	108	202	233	218	156
ZMOp36x041	114	195	137	154	190	313	285	309	325	192	250	190	195	278	328	217	179	156	146	208	199	212	167	195	197	199	198	225	165	134	205	195	132	519	324	395	542	456	410	534	612	218	244	379	418
ZMOp36x042	219	227	175	197	239	701	542	653	807	639	703	751	857	1025	967	928	902	139	95	115	113	203	152	291	279	160	186	158	165	580	174	658	292	626	656	1195	882	424	443	466	502	642	687	785	777
ZMOp36x043	45	45	38	45	39	59	90	89	94	129	73	157	174	190	153	162	153	32	31	33	32	38	26	68	42	25	25	48	62	72	25	84	29	1304	1263	441	469	850	987	610	577	478	466	492	489
ZMOp36x044	101	121	126	119	117	180	170	200	184	242	234	208	331	543	390	354	477	95	66	64	90	109	105	170	161	63	83	77	100	171	59	196	77	2025	1708	700	655	1633	1747	1296	1418	899	788	932	863
ZMOp36x045	43	56	38	37	34	63	52	54	74	74	52	101	136	147	134	129	187	25	45	43	33	45	30	49	37	35	73	45	82	34	38	38	18	532	545	509	420	528	580	491	519	419	417	488	455
ZMOp36x046	41	35	28	30	24	116	104	109	140	52	99	59	97	124	75	74	119	13	18	25	20	27	15	33	28	24	25	18	14	29	17	38	26	337	361	239	149	263	285	221	264	195	179	207	225
ZMOp36x047	4	1	3	3	5	5	11	3	2	3	21	6	9	5	4	7	17	1	1	2	1	3	1	3	4	2	2	1	3	3	4	6	1	21	19	6	8	17	10	11	10	11	9	13	12
ZMOp39x001	2	1	2	1	5	1	3	3	1	1	5	2	2	1	0	4	9	1	1	1	1	1	1	1	2	1	2	1	1	1	1	1	3	1	1	0	2	0	1	1	0	1	2	1	1
ZMOp39x002	2	6	3	1	5	31	36	9	35	16	10	16	12	20	26	33	51	2	2	1	7	4	5	11	13	3	3	1	7	7	4	9	4	56	56	55	33	31	32	57	41	139	166	80	81
ZMOp39x003	243	233	203	215	342	3095	3914	2898	2681	845	698	901	2041	1645	2681	2516	2103	86	64	85	65	70	58	206	145	90	117	146	133	165	106	228	69	1234	1807	471	306	1033	1176	1636	1266	1832	2631	1897	1571
ZMOp39x004	1912	1182	2646	1818	1348	4928	6440	5006	4970	1588	1744	1564	2497	2345	3765	2874	3031	528	570	817	1001	487	416	555	629	709	1655	845	1270	730	1261	829	591	1447	1791	1014	718	1245	1358	1451	1236	1094	1276	1310	1364
ZMOp39x005	258	210	203	205	147	231	340	180	146	345	323	327	454	382	402	494	426	368	261	262	227	534	331	832	575	279	353	170	212	156	322	181	269	358	400	343	245	358	337	481	359	503	591	359	389
ZMOp39x006	262	158	170	143	215	182	353	195	164	365	406	369	503	407	500	464	596	294	198	186	240	424	314	533	539	173	186	188	221	89	253	110	153	293	318	300	238	338	316	385	331	410	518	306	327
ZMOp39x007	1690	1754	1268	5163	11199	3324	3742	3568	3331	2778	2567	2475	5030	5206	6324	5538	6104	1687	1067	1879	2277	1400	1105	2079	2569	1309	1108	1343	1384	2833	2229	3042	1949	1171	1374	989	885	1324	1449	1651	1418	1021	1090	1107	1007
ZMOp39x008	9209	9703	8754	11140	9358	1678	1528	1967	2117	1760	1854	1392	549	573	610	538	417	2165	2188	3360	3024	1464	1999	1376	1989	8064	8602	6257	4847	5165	8784	4821	6833	620	718	674	821	517	521	385	368	382	394	394	404
ZMOp39x009	2281	2697	2396	2780	2295	1236	1241	1131	1390	1761	1661	1599	1897	1875	1410	1802	1439	2426	1638	3207	2334	1448	1360	1607	1792	2179	2020	2869	2487	1315	1964	1603	2125	617	580	927	987	924	865	700	736	1139	1214	914	831
ZMOp39x010	460	522	477	514	440	115	121	135	124	225	240	217	216	186	161	203	221	309	332	399	399	161	210	131	189	325	280	406	348	235	401	262	340	219	220	330	335	268	279	245	274	511	599	494	414
ZMOp39x011	710	1039	616	2619	4957	711	915	702	720	1284	1062	900	547	476	549	571	443	1231	814	1152	1522	930	811	1115	1621	834	1083	915	1284	829	1386	854	983	386	409	410	370	337	319	345	329	665	862	696	671
ZMOp39x012	626	700	599	884	1011	2217	2561	2764	2735	1270	1161	1203	954	760	858	1098	877	458	312	432	439	584	384	648	716	405	485	471	400	1292	757	1381	948	376	441	393	344	232	243	285	255	385	403	364	357
ZMOp39x013	314	489	362	526	444	1059	1104	1194	1224	601	495	598	451	383	388	442	409	240	216	276	308	231	295	227	237	334	314	343	404	365	316	360	305	233	213	142	120	161	171	186	185	148	170	144	147
ZMOp39x014	348	442	433	526	430	798	688	914	919	414	515	509	320	338	328	394	358	222	236	282	344	141	236	114	224	328	312	307	334	431	401	383	312	134	111	117	97	111	102	117	115	76	94	76	89
ZMOp39x015	772	810	967	1114	860	1729	1186	1936	2210	1807	1776	2074	2386	2110	1054	2258	3295	214	250	231	324	182	256	143	223	333	358	272	322	392	456	347	297	267	146	287	324	177	165	201	256	98	94	115	104
ZMOp39x016	1920	2103	2411	2680	2100	2004	1646	2073	2538	1734	1656	1785	1110	1278	872	1197	1507	640	712	828	1053	371	643	250	404	1093	1118	981	1192	1226	1366	1141	1004	319	232	292	264	220	217	247	293	220	236	278	256
ZMOp39x017	105	174	120	139	112	42	19	17	28	37	31	34	32	23	28	18	43	36	43	44	51	20	15	15	19	52	62	38	62	25	57	34	26	30	25	29	25	32	30	33	27	23	25	27	26
ZMOp39x018	5457	9430	8658	10007	7336	3089	2783	2912	3124	2149	2255	1621	1528	1590	1536	1713	1899	1623	1436	2208	2105	661	924	689	859	1973	2605	2257	2391	789	1822	825	703	724	565	600	622	553	637	555	555	290	299	307	303
ZMOp39x019	4	6	2	4	5	6	3	3	5	3	5	7	2	4	2	4	17	3	1	2	1	2	2	3	3	3	8	1	4	2	1	6	5	4	3	5	2	4	2	3	2	3	3	1	2
ZMOp39x020	652	797	673	866	733	310	320	321	255	245	271	158	269	194	230	254	255	573	431	770	441	263	319	241	218	788	730	812	637	612	624	687	796	309	355	508	403	335	314	392	326	591	658	670	592
ZMOp39x021	664	843	729	841	654	473	488	507	442	298	208	241	333	372	430	479	375	673	461	804	577	357	370	388	321	941	1003	1004	820	819	725	864	851	353	344	400	406	335	331	408	317	353	373	323	371
ZMOp39x022	26	31	16	25	24	19	22	9	18	13	10	11	35	25	23	41	43	27	4	15	13	12	6	10	8	24	25	27	21	30	28	19	22	29	26	32	30	25	26	28	23	18	19	18	15
ZMOp39x023	144	189	151	185	205	294	331	269	251	241	266	273	461	701	558	656	622	44	25	74	78	44	30	91	59	54	66	70	93	73	30	92	36	66	60	35	38	82	70	83	76	32	40	30	29
ZMOp39x024	26	34	27	39	29	35	14	17	21	17	10	23	23	34	32	41	68	32	46	56	62	41	37	40	42	43	49	61	64	20	34	39	18	22	26	29	25	22	21	28	23	84	75	42	56
ZMOp39x025	24	66	49	60	59	68	68	69	83	36	42	30	49	39	49	63	77	42	41	46	64	33	27	34	33	45	42	55	65	75	45	108	39	46	46	50	33	43	36	43	47	100	115	124	108
ZMOp39x026	1434	1820	1506	1591	1436	913	926	770	836	740	750	612	676	522	635	903	681	1495	1212	1709	1225	1406	1222	1308	1052	1589	2081	1765	1450	6304	2233	7166	4317	380	519	554	538	315	373	384	325	921	856	965	960
ZMOp39x027	5591	3274	16916	4949	2364	1455	1671	1589	2148	2689	3108	3188	2958	2471	1851	3393	4614	562	366	641	499	819	497	805	838	634	606	669	618	3309	1376	2904	1729	804	850	1688	1282	396	432	498	529	802	808	859	800
ZMOp39x028	34	19	16	12	39	15	19	17	32	56	68	60	26	14	22	37	34	14	8	8	14	13	10	20	11	9	20	11	15	37	24	32	26	62	73	175	157	39	45	51	49	59	60	67	82
ZMOp39x029	6	7	5	7	10	22	30	32	27	21	57	27	33	19	28	44	34	4	3	4	10	2	4	10	7	3	12	4	7	9	3	6	1	34	40	12	18	25	28	31	26	4	4	3	3
ZMOp39x030	4913	4706	8460	6806	5411	3294	3545	3605	4333	2732	2817	2744	1355	800	1307	1448	1269	1989	1490	2435	1813	2349	1603	2022	2034	2261	2322	2812	2047	2883	3882	3008	4026	2728	2631	1900	1934	1568	1663	1817	1779	1176	1360	1691	1529
ZMOp39x031	1127	1021	1040	1150	1070	1519	1720	1629	1544	1261	1213	1082	2098	2261	2209	1916	2401	788	902	835	884	587	797	725	978	1057	1285	821	905	1035	1667	974	1022	367	273	180	210	318	351	340	380	152	146	134	124
ZMOp39x032	329	573	554	685	440	171	194	186	151	261	255	213	127	71	122	144	51	296	380	368	491	111	263	42	65	223	302	219	300	92	215	89	327	38	40	32	36	44	49	31	26	17	19	11	17
ZMOp39x033	32	56	63	37	49	20	11	9	19	54	42	73	44	22	22	48	51	80	69	58	78	35	62	20	12	37	29	44	35	17	30	20	71	108	105	45	32	162	140	55	54	18	15	14	16
ZMOp39x034	13452	11928	10542	11337	12420	18382	18325	18511	18343	8981	9534	8346	5373	4181	5207	6005	5611	9848	5974	10995	6511	12872	7802	16139	11734	9475	10268	9989	7989	14195	14790	15972	18094	5867	8109	13954	13377	4435	4683	6191	5957	14351	16499	17998	16842
