# Supplementary material for: Complete genome sequence and the expression pattern of plasmids of the model ethanologen Zymomonas mobilis ZM4 and its xylose-utilizing derivatives 8b and 2032
Source: Biotechnol Biofuels. 2018 May 2;11:125. doi: 10.1186/s13068-018-1116-x (PMC5930841; doi:10.1186/s13068-018-1116-x)
Supplement: Supplementary file 6 — Additional file 6: Table S5. Comparison of RNA-Seq from 6% and 9% ACSH. [file 13068_2018_1116_MOESM6_ESM.xlsx]

## Sheet: cluster.genes.colors
Gene ID	Cluster ID
ZMOp36x026	1
ZMOp39x001	1
ZMOp32x016	1
ZMOp39x019	1
ZMOp32x014	1
ZMOp36x014	1
ZMOp36x047	1
ZMOp33x007	1
ZMOp32x020	1
ZMOp32x027	1
ZMOp32x025	1
ZMOp32x028	1
ZMOp32x031	1
ZMOp39x029	1
ZMOp32x030	1
ZMOp32x011	2
ZMOp33x031	2
ZMOp32x024	2
ZMOp39x034	2
ZMOp33x033	2
ZMOp32x008	2
ZMOp32x023	2
ZMOp32x009	2
ZMOp32x022	2
ZMOp32x021	2
ZMOp36x038	2
ZMOp36x031	2
ZMOp39x030	2
ZMOp32x001	2
ZMOp33x005	2
ZMOp36x032	2
ZMOp33x006	2
ZMOp36x029	2
ZMOp36x030	2
ZMOp39x002	3
ZMOp36x003	3
ZMOp36x022	3
ZMOp36x035	3
ZMOp36x034	3
ZMOp33x032	4
ZMOp33x034	4
ZMOp39x032	4
ZMOp39x022	4
ZMOp39x024	4
ZMOp39x017	4
ZMOp39x033	4
ZMOp36x036	4
ZMOp36x016	5
ZMOp36x017	5
ZMOp36x009	5
ZMOp36x008	5
ZMOp36x027	6
ZMOp36x013	6
ZMOp36x037	6
ZMOp36x004	7
ZMOp36x019	7
ZMOp36x015	7
ZMOp36x005	7
ZMOp32x015	8
ZMOp32x012	8
ZMOp32x013	8
ZMOp39x028	9
ZMOp36x021	9
ZMOp36x007	9
ZMOp36x002	9
ZMOp32x018	9
ZMOp36x042	9
ZMOp39x025	9
ZMOp36x041	9
ZMOp36x023	10
ZMOp36x033	10
ZMOp36x010	10
ZMOp36x046	10
ZMOp36x045	10
ZMOp36x043	10
ZMOp36x044	10
ZMOp36x006	10
ZMOp36x001	10
ZMOp36x011	10
ZMOp36x012	10
ZMOp36x040	11
ZMOp33x014	11
ZMOp33x035	11
ZMOp36x025	11
ZMOp33x039	11
ZMOp33x013	11
ZMOp33x003	11
ZMOp33x030	11
ZMOp33x040	11
ZMOp33x008	11
ZMOp33x025	12
ZMOp33x020	12
ZMOp33x029	12
ZMOp33x028	12
ZMOp39x023	12
ZMOp33x024	12
ZMOp32x017	12
ZMOp33x009	12
ZMOp39x012	12
ZMOp39x016	12
ZMOp39x014	12
ZMOp39x013	12
ZMOp32x007	13
ZMOp39x003	13
ZMOp33x038	13
ZMOp39x004	13
ZMOp33x036	13
ZMOp33x037	13
ZMOp36x018	14
ZMOp36x020	14
ZMOp39x006	14
ZMOp39x005	14
ZMOp39x010	14
ZMOp39x021	14
ZMOp33x027	14
ZMOp33x026	14
ZMOp36x024	14
ZMOp36x028	14
ZMOp39x020	14
ZMOp36x039	14
ZMOp39x008	15
ZMOp32x002	15
ZMOp32x004	15
ZMOp32x005	15
ZMOp32x026	15
ZMOp39x009	15
ZMOp33x004	15
ZMOp33x019	16
ZMOp33x016	16
ZMOp33x011	16
ZMOp39x026	16
ZMOp33x012	16
ZMOp33x001	16
ZMOp33x015	16
ZMOp33x002	16
ZMOp33x022	17
ZMOp33x018	17
ZMOp33x021	17
ZMOp33x023	17
ZMOp39x027	18
ZMOp32x010	18
ZMOp32x006	18
ZMOp39x007	18
ZMOp33x010	18
ZMOp39x011	18
ZMOp32x029	18
ZMOp39x018	18
ZMOp39x015	18
ZMOp39x031	18
ZMOp32x019	18
ZMOp32x003	18
ZMOp33x017	18
