# Supplementary material for: Complete genome sequence and the expression pattern of plasmids of the model ethanologen Zymomonas mobilis ZM4 and its xylose-utilizing derivatives 8b and 2032
Source: Biotechnol Biofuels. 2018 May 2;11:125. doi: 10.1186/s13068-018-1116-x (PMC5930841; doi:10.1186/s13068-018-1116-x)
Supplement: Supplementary file 7 — Additional file 7: Table S6. Comparison of RNA-Seq from anaerobic and aerobic conditions. [file 13068_2018_1116_MOESM7_ESM.xlsx]

## Sheet: All Data
Plasmid Gene	PPEE	PPDE	CEBF	c1.6_ACSH_G_AGAAY	c1.6_ACSH_G_AGABB	c1.6_ACSH_G_AGABN	c1.6_ACSH_G_AGABX	c1.6_ACSH_G_AGABZ	c2.9_ACSH_G_AGABT	c2.9_ACSH_G_AGACG	c2.9_ACSH_G_AGACN	avg.c1.6_ACSH_G	avg.c2.9_ACSH_G	c2.9_ACSH_G.vs..c1.6_ACSH_G	crt.c2.9_ACSH_G.c1.6_ACSH_G
ZMOp32x001	0.711402	0.288598	0.288598	13645.4	17629	18584.1	21398	19588.8	26796.2	26796.2	26796.2	18169.1	26796.2	1.47483	1.25228
ZMOp32x002	3.76256e-10	1	1	11286.2	12351.3	9313.78	11286.2	11286.2	8065.25	8709.04	9984.61	11104.7	8919.63	-1.24498	0.932814
ZMOp32x003	0.00738608	0.992614	0.992614	3966.49	2761.11	2949.98	3209.28	2661.56	2151.94	2326.01	2761.11	3109.68	2413.02	-1.28871	0.963946
ZMOp32x004	3.71592e-13	1	1	28776.5	22642.2	23928.7	26796.2	16915.8	13645.4	10372.4	11886	23811.9	11967.9	-1.98964	1.23968
ZMOp32x005	0.898488	0.101512	0.101512	16257.2	13018.8	11886	16257.2	17629	20457.2	19588.8	18584.1	15009.6	19543.4	1.30206	1.05418
ZMOp32x006	0	1	1	3405.55	4601.88	4601.88	4330.95	4220.93	8709.04	8065.25	9006.29	4232.24	8593.52	2.03049	1.7526
ZMOp32x007	3.33067e-16	1	1	3142.25	3142.25	2661.56	3142.25	3525.88	5103.11	4912.59	4601.88	3122.84	4872.53	1.56029	1.30517
ZMOp32x008	0	1	1	21398	13645.4	10866.5	13645.4	12351.3	54938.7	43033.4	47894.7	14381.3	48622.2	3.38093	2.01109
ZMOp32x009	0	1	1	47894.7	37592.5	30779.5	33633	37592.5	106208	106208	106208	37498.5	106208	2.83233	2.21753
ZMOp32x010	0	1	1	3525.88	3209.28	3209.28	3709.06	3405.55	9677.78	11886	11286.2	3411.81	10950	3.20944	2.60922
ZMOp32x011	0	1	1	78282.5	78282.5	78282.5	78282.5	78282.5	135515	195338	135515	78282.5	155456	1.98583	1.7311
ZMOp32x012	0	1	1	687.89	861.772	717.087	589.479	410.903	4912.59	4096.63	6263.28	653.426	5090.83	7.79099	4.75373
ZMOp32x013	0	1	1	744.678	1112.71	800.047	1012.64	952.929	6063.97	3966.49	6494.61	924.601	5508.36	5.95755	3.56471
ZMOp32x014	1	7.28325e-21	7.28325e-21	118.835	62.1744	12.1003	48.3726	27.2452	48.3726	12.1003	139.651	53.7455	66.7081	1.24119	0.101824
ZMOp32x015	3.33067e-16	1	1	519.532	589.479	565.124	1285.81	1198.42	2835.18	2835.18	3142.25	831.673	2937.54	3.53209	2.20498
ZMOp32x016	0.528805	0.471195	0.471195	1045.9	1242.28	1329.92	1520.64	1378.24	1855.65	1428.81	1786.89	1303.4	1690.45	1.29696	0.939607
ZMOp32x017	0	1	1	350.9	410.903	429.839	453.41	289.646	1329.92	1479.68	1661.16	386.94	1490.25	3.85138	2.93315
ZMOp32x018	3.82849e-06	0.999996	0.999996	3838.2	4330.95	3709.06	4601.88	4096.63	3283.06	2949.98	2835.18	4115.34	3022.74	-1.36146	1.12976
ZMOp32x019	1	1.3594e-17	1.3594e-17	62.1744	10.2422	12.1003	35.124	27.2452	269.297	118.835	77.607	29.3772	155.246	5.28458	1.24821
ZMOp32x020	0.938541	0.0614585	0.0614585	67497.8	67497.8	67497.8	60829.5	67497.8	43033.4	54938.7	54938.7	66164.1	50970.2	-1.29809	1.10723
ZMOp32x021	0.944419	0.0555813	0.0555813	60829.5	54938.7	60829.5	67497.8	54938.7	47894.7	47894.7	43033.4	59806.8	46274.2	-1.29244	1.14707
ZMOp32x022	0	1	1	43033.4	47894.7	37592.5	47894.7	47894.7	60829.5	60829.5	60829.5	44862	60829.5	1.35593	1.27007
ZMOp32x023	1.42967e-05	0.999986	0.999986	135515	195338	195338	195338	195338	78282.5	78282.5	78282.5	183373	78282.5	-2.34245	1.7311
ZMOp32x024	0.410723	0.589277	0.589277	139.651	35.124	95.2068	171.312	328.437	95.2068	186.629	226.117	153.946	169.317	1.09985	0.289878
ZMOp32x025	0.904251	0.0957485	0.0957485	15007	26796.2	21398	28776.5	23928.7	22642.2	22642.2	23928.7	23181.3	23071	-1.00478	0.627152
ZMOp32x026	1	7.55096e-20	7.55096e-20	157.158	48.3726	186.629	109.476	118.835	171.312	157.158	118.835	124.094	149.102	1.20152	0.636745
ZMOp32x027	0.157142	0.842858	0.842858	35.124	289.646	157.158	206.288	310.766	474.195	429.839	109.476	199.796	337.837	1.6909	0.352278
ZMOp32x028	3.68247e-07	1	1	14277.3	23928.7	25378.2	30779.5	25378.2	11886	11286.2	7723.61	23948.4	10298.6	-2.32541	1.20119
ZMOp32x029	0.233148	0.766852	0.766852	1479.68	1012.64	1661.16	927.156	1428.81	565.124	1198.42	687.89	1301.89	817.145	-1.59322	0.773648
ZMOp33x001	0	1	1	33633	28776.5	26796.2	23928.7	28776.5	11286.2	15496.5	17629	28382.2	14803.9	-1.91721	1.35735
ZMOp33x002	1.45369e-06	0.999999	0.999999	20457.2	21398	22642.2	20457.2	18584.1	15007	17629	20457.2	20707.7	17697.7	-1.17008	0.908441
ZMOp33x003	0.968535	0.0314646	0.0314646	1786.89	1715.52	1855.65	1993.86	1855.65	1993.86	2151.94	2326.01	1841.51	2157.27	1.17147	1
ZMOp33x004	0.0402837	0.959716	0.959716	26796.2	25378.2	20457.2	22642.2	21398	33633	28776.5	33633	23334.3	32014.2	1.37198	1.0739
ZMOp33x005	0.811176	0.188824	0.188824	23928.7	18584.1	15496.5	11886	15496.5	25378.2	30779.5	19588.8	17078.4	25248.9	1.47841	0.818632
ZMOp33x006	0.00119593	0.998804	0.998804	15496.5	9984.61	9006.29	9006.29	8709.04	23928.7	23928.7	22642.2	10440.5	23499.9	2.25083	1.46112
ZMOp33x007	0.993653	0.00634684	0.00634684	95.2068	157.158	269.297	8.38416	206.288	35.124	12.1003	18.323	147.267	21.8491	-6.74018	0.238701
ZMOp33x008	0	1	1	3209.28	4912.59	4912.59	4096.63	3966.49	1624.35	1715.52	1378.24	4219.51	1572.7	-2.68297	1.87073
ZMOp33x009	2.42494e-11	1	1	664.286	744.678	664.286	744.678	589.479	1012.64	987.302	1012.64	681.481	1004.2	1.47355	1.32581
ZMOp33x010	5.74746e-10	1	1	2417.06	2661.56	2835.18	2500.16	2233.67	3525.88	3525.88	4330.95	2529.53	3794.24	1.49998	1.24362
ZMOp33x011	0.000911115	0.999089	0.999089	5103.11	4485.62	4096.63	3838.2	4485.62	4601.88	5589.84	6063.97	4401.84	5418.56	1.23098	0.901779
ZMOp33x012	5.9383e-10	1	1	11886	11286.2	15007	13018.8	10866.5	9006.29	9313.78	10372.4	12412.9	9564.17	-1.29785	1.04763
ZMOp33x013	0.012123	0.987877	0.987877	4601.88	3966.49	5103.11	3630.43	2949.98	2417.06	3142.25	3283.06	4050.38	2947.46	-1.37419	0.898545
ZMOp33x014	0.655083	0.344917	0.344917	717.087	687.89	1198.42	717.087	897.43	350.9	664.286	828.865	843.583	614.684	-1.37238	0.829918
ZMOp33x015	0.362006	0.637994	0.637994	18584.1	11886	13018.8	8709.04	8065.25	21398	21398	25378.2	12052.6	22724.7	1.88546	1.15141
ZMOp33x016	0.00476877	0.995231	0.995231	5404.82	5589.84	6063.97	5103.11	5589.84	6820.07	6063.97	7090.52	5550.32	6658.19	1.19961	1
ZMOp33x017	0.975667	0.0243335	0.0243335	2761.11	2500.16	3022.37	2326.01	2761.11	2761.11	2417.06	2579.14	2674.15	2585.77	-1.03418	0.842418
ZMOp33x018	5.11791e-12	1	1	5589.84	5795.93	7090.52	5795.93	6063.97	9984.61	9677.78	12351.3	6067.24	10671.2	1.75883	1.36489
ZMOp33x019	5.39575e-09	1	1	9984.61	9006.29	11286.2	9677.78	9313.78	5589.84	6263.28	5795.93	9853.73	5883.02	-1.67494	1.43795
ZMOp33x020	1.32467e-11	1	1	4755.13	5103.11	5404.82	5259.68	5404.82	3405.55	3630.43	3525.88	5185.51	3520.62	-1.4729	1.3098
ZMOp33x021	0.922862	0.077138	0.077138	8709.04	10372.4	10372.4	10866.5	10372.4	14277.3	13645.4	13645.4	10138.6	13856	1.36667	1.25573
ZMOp33x022	1.4196e-09	1	1	7398.72	8065.25	8356.41	8356.41	8356.41	16257.2	16915.8	16257.2	8106.64	16476.7	2.0325	1.94547
ZMOp33x023	0.628173	0.371827	0.371827	9006.29	14277.3	19588.8	19588.8	14277.3	12351.3	15007	15007	15347.7	14121.7	-1.08682	0.600141
ZMOp33x024	0.97378	0.0262205	0.0262205	987.302	952.929	987.302	897.43	1084.05	1242.28	1045.9	897.43	981.802	1061.87	1.08155	0.82785
ZMOp33x025	0	1	1	4220.93	6063.97	5795.93	5404.82	5259.68	1786.89	1855.65	987.302	5349.07	1543.28	-3.46604	2.27464
ZMOp33x026	0.52602	0.47398	0.47398	4330.95	3405.55	3630.43	3525.88	3142.25	3709.06	4755.13	3630.43	3607.01	4031.54	1.1177	0.838252
ZMOp33x027	0.00360394	0.996396	0.996396	4912.59	4096.63	4485.62	3966.49	4330.95	4755.13	6494.61	5589.84	4358.45	5613.19	1.28789	0.967948
ZMOp33x028	0.000105201	0.999895	0.999895	1520.64	1520.64	1993.86	1786.89	1520.64	987.302	1012.64	1045.9	1668.54	1015.28	-1.64342	1.45391
ZMOp33x029	1	5.11497e-20	5.11497e-20	861.772	767.574	1012.64	828.865	617.284	589.479	453.41	410.903	817.628	484.597	-1.68723	1.04717
ZMOp33x030	3.21408e-07	1	1	2072.57	1574.63	1574.63	1574.63	1715.52	3022.37	3405.55	3966.49	1702.39	3464.8	2.03525	1.45827
ZMOp33x031	0.460085	0.539915	0.539915	195338	106208	135515	106208	106208	195338	135515	195338	129895	175397	1.35029	0.693748
ZMOp33x032	0.864198	0.135802	0.135802	269.297	250.03	310.766	370.074	370.074	77.607	289.646	95.2068	314.048	154.153	-2.03725	0.863228
ZMOp33x033	7.43932e-08	1	1	25378.2	8356.41	7723.61	6063.97	6263.28	37592.5	37592.5	37592.5	10757.1	37592.5	3.49467	1.48129
ZMOp33x034	0.0104439	0.989556	0.989556	1242.28	664.286	617.284	800.047	350.9	186.629	350.9	157.158	734.96	231.562	-3.17392	1
ZMOp33x035	1.20378e-07	1	1	2151.94	2072.57	2072.57	2233.67	1661.16	1378.24	767.574	1574.63	2038.38	1240.15	-1.64366	1.05496
ZMOp33x036	0.000159121	0.999841	0.999841	10372.4	3525.88	3525.88	2579.14	3630.43	19588.8	20457.2	16915.8	4726.76	18987.3	4.01698	1.63084
ZMOp33x037	7.54993e-09	1	1	16915.8	6494.61	6820.07	6494.61	5103.11	28776.5	25378.2	30779.5	8365.65	28311.4	3.38425	1.50026
ZMOp33x038	0	1	1	6263.28	3022.37	3966.49	3022.37	3283.06	15496.5	13018.8	13018.8	3911.51	13844.7	3.53947	2.07858
ZMOp33x039	0	1	1	5259.68	5259.68	5259.68	4912.59	5795.93	2233.67	1661.16	1715.52	5297.51	1870.12	-2.83272	2.19934
ZMOp33x040	1.25873e-06	0.999999	0.999999	1993.86	1993.86	1918.34	2072.57	1786.89	952.929	1084.05	1112.71	1953.1	1049.9	-1.86028	1.60589
ZMOp36x001	0.0902498	0.90975	0.90975	828.865	717.087	767.574	474.195	664.286	410.903	370.074	519.532	690.401	433.503	-1.59261	0.912735
ZMOp36x002	0.580023	0.419977	0.419977	226.117	328.437	390.864	350.9	171.312	139.651	226.117	350.9	293.526	238.889	-1.22871	0.488209
ZMOp36x003	0.470408	0.529592	0.529592	250.03	171.312	109.476	118.835	390.864	109.476	12.1003	35.124	208.104	52.2335	-3.98411	1
ZMOp36x004	0	1	1	1624.35	1786.89	1428.81	1329.92	1158.27	390.864	77.607	390.864	1465.65	286.445	-5.11667	2.96335
ZMOp36x005	0.804861	0.195139	0.195139	1715.52	1624.35	1520.64	1428.81	1624.35	1428.81	1786.89	1520.64	1582.73	1578.78	-1.0025	0.799605
ZMOp36x006	0	1	1	767.574	542.886	453.41	519.532	717.087	2072.57	1624.35	2151.94	600.098	1949.62	3.24883	2.11621
ZMOp36x007	1.51968e-06	0.999998	0.999998	186.629	226.117	171.312	250.03	186.629	519.532	519.532	429.839	204.143	489.634	2.39848	1.71915
ZMOp36x008	0	1	1	1428.81	1428.81	1285.81	1084.05	1329.92	2949.98	2761.11	3022.37	1311.48	2911.15	2.21975	1.93246
ZMOp36x009	2.21524e-05	0.999978	0.999978	1855.65	2233.67	2326.01	2417.06	2326.01	1574.63	1378.24	1918.34	2231.68	1623.74	-1.37441	0.96732
ZMOp36x010	2.32488e-07	1	1	410.903	453.41	687.89	767.574	767.574	157.158	139.651	62.1744	617.47	119.661	-5.16015	2.61458
ZMOp36x011	0.789247	0.210753	0.210753	542.886	800.047	927.156	952.929	927.156	717.087	927.156	617.284	830.035	753.842	-1.10107	0.585539
ZMOp36x012	0.68716	0.31284	0.31284	927.156	828.865	828.865	1378.24	638.967	687.89	687.89	927.156	920.419	767.645	-1.19902	0.689169
ZMOp36x013	0	1	1	2233.67	2326.01	2417.06	2761.11	2579.14	1112.71	589.479	1285.81	2463.4	995.999	-2.47329	1.73717
ZMOp36x014	1	2.88605e-21	2.88605e-21	8.38416	10.2422	12.1003	157.158	27.2452	4.95153	12.1003	8.38416	43.026	8.47865	-5.07463	0.692891
ZMOp36x015	8.24228e-09	1	1	1661.16	1918.34	1786.89	1715.52	1993.86	1158.27	1158.27	1198.42	1815.15	1171.65	-1.54923	1.38613
ZMOp36x016	0.77245	0.22755	0.22755	1084.05	617.284	638.967	638.967	542.886	494.035	861.772	494.035	704.431	616.614	-1.14242	0.629965
ZMOp36x017	0.835151	0.164849	0.164849	1198.42	1285.81	1378.24	1045.9	1574.63	1285.81	1574.63	1084.05	1296.6	1314.83	1.01406	0.688448
ZMOp36x018	0.000101162	0.999899	0.999899	2539.65	3630.43	3405.55	3283.06	3709.06	4220.93	3838.2	4485.62	3313.55	4181.58	1.26196	1.03482
ZMOp36x019	1	1.87243e-16	1.87243e-16	1158.27	1158.27	1158.27	1158.27	1285.81	617.284	617.284	638.967	1183.77	624.512	-1.89552	1.81272
ZMOp36x020	1	3.5475e-21	3.5475e-21	2326.01	2417.06	2151.94	2151.94	2072.57	2326.01	2233.67	2233.67	2223.9	2264.45	1.01823	0.924125
ZMOp36x021	1.35148e-10	1	1	206.288	77.607	139.651	62.1744	109.476	1084.05	474.195	861.772	119.039	806.672	6.77651	2.2987
ZMOp36x022	1	2.12324e-18	2.12324e-18	8.38416	95.2068	118.835	77.607	27.2452	118.835	250.03	171.312	65.4556	180.059	2.75086	1
ZMOp36x023	0.50555	0.49445	0.49445	1012.64	565.124	744.678	429.839	687.89	328.437	269.297	565.124	688.035	387.619	-1.77503	0.76061
ZMOp36x024	0.837742	0.162258	0.162258	9313.78	6820.07	5589.84	5589.84	4912.59	6494.61	7090.52	5103.11	6445.22	6229.42	-1.03464	0.692839
ZMOp36x025	0	1	1	7090.52	9313.78	9677.78	9984.61	9677.78	2579.14	3022.37	1855.65	9148.9	2485.72	-3.68058	2.34602
ZMOp36x026	1	3.3958e-21	3.3958e-21	8.38416	10.2422	12.1003	8.38416	27.2452	4.95153	12.1003	12.1003	13.2712	9.71735	-1.36572	0.692891
ZMOp36x027	0	1	1	3630.43	5404.82	4755.13	4755.13	4601.88	1661.16	1520.64	1329.92	4629.48	1503.91	-3.0783	2.18548
ZMOp36x028	5.4565e-08	1	1	5795.93	7398.72	6494.61	7090.52	7723.61	3630.43	3709.06	4755.13	6900.68	4031.54	-1.71167	1.21888
ZMOp36x029	0.000122329	0.999878	0.999878	13018.8	15496.5	13645.4	15496.5	15007	16915.8	14277.3	14277.3	14532.8	15156.8	1.04294	0.921328
ZMOp36x030	3.10148e-07	1	1	19588.8	19588.8	16257.2	15007	20457.2	17629	16257.2	15496.5	18179.8	16460.9	-1.10442	0.851267
ZMOp36x031	9.68044e-06	0.99999	0.99999	8356.41	20457.2	16915.8	18584.1	13018.8	9313.78	6820.07	8065.25	15466.5	8066.37	-1.9174	0.897209
ZMOp36x032	0.91009	0.0899102	0.0899102	30779.5	33633	28776.5	25378.2	26796.2	30779.5	33633	28776.5	29072.7	31063	1.06846	0.855603
ZMOp36x033	0.238542	0.761458	0.761458	897.43	370.074	494.035	565.124	519.532	542.886	744.678	952.929	569.239	746.831	1.31198	0.604934
ZMOp36x034	0.7432	0.2568	0.2568	474.195	186.629	328.437	269.297	157.158	226.117	95.2068	269.297	283.143	196.873	-1.4382	0.583587
ZMOp36x035	0.634015	0.365985	0.365985	171.312	118.835	206.288	186.629	27.2452	62.1744	206.288	250.03	142.062	172.831	1.21659	0.301396
ZMOp36x036	3.62961e-08	1	1	565.124	927.156	897.43	861.772	861.772	310.766	310.766	328.437	822.651	316.656	-2.59793	1.72065
ZMOp36x037	1.73869e-10	1	1	2835.18	3709.06	3838.2	3405.55	3022.37	1715.52	2072.57	1158.27	3362.07	1648.78	-2.03912	1.36796
ZMOp36x038	1.17684e-14	1	1	10866.5	16915.8	17629	16915.8	16257.2	10866.5	8356.41	7398.72	15716.9	8873.87	-1.77114	1
ZMOp36x039	1.16573e-14	1	1	6494.61	9677.78	8065.25	9313.78	9984.61	3838.2	3209.28	3405.55	8707.21	3484.34	-2.49895	1.6921
ZMOp36x040	4.40184e-05	0.999956	0.999956	1378.24	1855.65	1479.68	1624.35	1112.71	800.047	494.035	206.288	1490.12	500.123	-2.97951	1.3908
ZMOp36x041	0.191291	0.808709	0.808709	494.035	897.43	589.479	687.89	828.865	767.574	1112.71	767.574	699.54	882.619	1.26171	0.855303
ZMOp36x042	0	1	1	638.967	494.035	474.195	410.903	565.124	1520.64	1918.34	1993.86	516.645	1810.95	3.50521	2.37985
ZMOp36x043	0.000414425	0.999586	0.999586	310.766	269.297	226.117	310.766	269.297	638.967	410.903	800.047	277.249	616.639	2.22414	1.32223
ZMOp36x044	3.00874e-10	1	1	390.864	429.839	542.886	390.864	453.41	861.772	952.929	717.087	441.573	843.929	1.91119	1.32088
ZMOp36x045	0.0237768	0.976223	0.976223	289.646	310.766	250.03	226.117	226.117	370.074	328.437	474.195	260.535	390.902	1.50038	1.05686
ZMOp36x046	0.00892969	0.99107	0.99107	370.074	350.9	289.646	328.437	250.03	429.839	897.43	453.41	317.817	593.56	1.86761	1.16149
ZMOp36x047	0.188288	0.811712	0.811712	48.3726	10.2422	48.3726	27.2452	27.2452	18.323	390.864	27.2452	32.2956	145.478	4.50457	0.378788
ZMOp39x001	1	3.3958e-21	3.3958e-21	8.38416	10.2422	12.1003	8.38416	27.2452	4.95153	12.1003	4.95153	13.2712	7.33444	-1.80944	0.692891
ZMOp39x002	1	1.11695e-15	1.11695e-15	8.38416	206.288	77.607	8.38416	27.2452	453.41	171.312	370.074	65.5817	331.599	5.05628	0.830453
ZMOp39x003	0	1	1	1918.34	1661.16	1624.35	1479.68	2417.06	6263.28	5259.68	6820.07	1820.12	6114.35	3.35931	2.17606
ZMOp39x004	0.91045	0.0895497	0.0895497	8065.25	6263.28	12351.3	7723.61	7398.72	8356.41	9984.61	8709.04	8360.44	9016.69	1.07849	0.67656
ZMOp39x005	4.20938e-09	1	1	4096.63	2949.98	3283.06	2835.18	2151.94	5404.82	5404.82	4912.59	3063.36	5240.75	1.71078	1.19918
ZMOp39x006	1.67855e-12	1	1	3709.06	2151.94	2500.16	1918.34	3209.28	5259.68	5795.93	5404.82	2697.76	5486.81	2.03384	1.41806
ZMOp39x007	0.940721	0.0592792	0.0592792	2949.98	2835.18	2233.67	7398.72	22642.2	4330.95	4220.93	4096.63	7611.95	4216.17	-1.80542	0.515745
ZMOp39x008	0	1	1	54938.7	60829.5	54938.7	54938.7	60829.5	10372.4	12351.3	8356.41	57295	10360.1	-5.53037	4.448
ZMOp39x009	6.95555e-12	1	1	12351.3	16257.2	14277.3	17629	13645.4	13018.8	10866.5	10866.5	14832	11583.9	-1.2804	0.948734
ZMOp39x010	0	1	1	6063.97	7090.52	6263.28	6263.28	6494.61	3142.25	3283.06	3209.28	6435.14	3211.53	-2.00376	1.84705
ZMOp39x011	0.876906	0.123094	0.123094	3022.37	4755.13	2761.11	10372.4	30779.5	5795.93	4601.88	3838.2	10338.1	4745.34	-2.17858	0.476387
ZMOp39x012	1.74633e-05	0.999983	0.999983	1574.63	1378.24	1242.28	1661.16	1918.34	2661.56	2661.56	2417.06	1554.93	2580.06	1.65928	1.25998
ZMOp39x013	0.103426	0.896574	0.896574	952.929	1084.05	861.772	1112.71	1012.64	1479.68	1242.28	1624.35	1004.82	1448.77	1.44182	1.11645
ZMOp39x014	0.764917	0.235083	0.235083	1112.71	1045.9	1084.05	1198.42	1045.9	1045.9	1285.81	1479.68	1097.39	1270.46	1.15771	0.872731
ZMOp39x015	0	1	1	3283.06	3283.06	4220.93	4485.62	3838.2	7723.61	7723.61	9677.78	3822.17	8375	2.19116	1.72186
ZMOp39x016	0.0105208	0.989479	0.989479	2661.56	2579.14	3142.25	2949.98	2835.18	2500.16	2500.16	2500.16	2833.62	2500.16	-1.13338	1.03159
ZMOp39x017	2.22045e-16	1	1	2539.65	3838.2	2579.14	2661.56	2500.16	828.865	565.124	744.678	2823.74	712.889	-3.96099	3.01637
ZMOp39x018	1.11022e-16	1	1	22642.2	43033.4	33633	37592.5	33633	7090.52	7398.72	5259.68	34106.8	6582.98	-5.18106	3.06028
ZMOp39x019	1	2.41895e-21	2.41895e-21	77.607	139.651	12.1003	95.2068	27.2452	27.2452	12.1003	48.3726	70.3621	29.2394	-2.40642	0.250147
ZMOp39x020	0	1	1	9677.78	15007	9984.61	14277.3	11886	3966.49	4330.95	2949.98	12166.5	3749.14	-3.24516	2.23456
ZMOp39x021	0	1	1	6820.07	7723.61	7398.72	6820.07	7090.52	3209.28	2579.14	2661.56	7170.6	2816.66	-2.54578	2.12511
ZMOp39x022	1	3.91496e-18	3.91496e-18	589.479	638.967	370.074	494.035	474.195	206.288	109.476	186.629	513.35	167.464	-3.06543	1.79397
ZMOp39x023	3.67849e-07	1	1	1329.92	1329.92	1112.71	1242.28	1479.68	1918.34	1993.86	2072.57	1298.9	1994.92	1.53585	1.29646
ZMOp39x024	0.986583	0.0134166	0.0134166	429.839	519.532	519.532	664.286	429.839	250.03	62.1744	289.646	512.605	200.617	-2.55515	1.48402
ZMOp39x025	0.31761	0.68239	0.68239	453.41	1198.42	952.929	987.302	987.302	664.286	717.087	542.886	915.873	641.42	-1.42788	0.632295
ZMOp39x026	0	1	1	7723.61	10866.5	8709.04	8065.25	9006.29	4096.63	4485.62	3709.06	8874.13	4097.1	-2.16595	1.72186
ZMOp39x027	0.899869	0.100131	0.100131	17629	8709.04	47894.7	12351.3	6820.07	7398.72	9006.29	9313.78	18680.8	8572.93	-2.17905	0.732256
ZMOp39x028	1.62767e-07	1	1	800.047	390.864	350.9	289.646	744.678	1198.42	1329.92	1428.81	515.227	1319.05	2.56013	1.49794
ZMOp39x029	0.00374353	0.996256	0.996256	109.476	109.476	62.1744	139.651	139.651	289.646	828.865	310.766	112.086	476.426	4.25054	2.07406
ZMOp39x030	7.14782e-05	0.999929	0.999929	37592.5	30779.5	43033.4	43033.4	43033.4	18584.1	18584.1	21398	39494.4	19522.1	-2.02306	1.43843
ZMOp39x031	0.513141	0.486859	0.486859	4485.62	4220.93	4330.95	4220.93	4755.13	4485.62	5103.11	4220.93	4402.71	4603.22	1.04554	0.887657
ZMOp39x032	8.25956e-05	0.999917	0.999917	1285.81	1479.68	1715.52	1855.65	1242.28	744.678	800.047	589.479	1515.79	711.401	-2.13071	1.55276
ZMOp39x033	0.666794	0.333206	0.333206	617.284	987.302	1045.9	617.284	800.047	927.156	542.886	1242.28	813.563	904.108	1.11129	0.519062
ZMOp39x034	1.17211e-05	0.999988	0.999988	106208	135515	106208	135515	135515	67497.8	67497.8	67497.8	123792	67497.8	-1.83402	1.5735

## Sheet: All Responsive
Plasmid Gene	Product	PPEE	PPDE	CEBF	c1.6_ACSH_G_AGAAY	c1.6_ACSH_G_AGABB	c1.6_ACSH_G_AGABN	c1.6_ACSH_G_AGABX	c1.6_ACSH_G_AGABZ	c2.9_ACSH_G_AGABT	c2.9_ACSH_G_AGACG	c2.9_ACSH_G_AGACN	avg.c1.6_ACSH_G	avg.c2.9_ACSH_G	c2.9_ACSH_G.vs..c1.6_ACSH_G	crt.c2.9_ACSH_G.c1.6_ACSH_G
ZMOp32x012	hypothetical protein	0	1	1	687.89	861.772	717.087	589.479	410.903	4912.59	4096.63	6263.28	653.426	5090.83	7.79099	4.75373
ZMOp36x021	hypothetical protein	1.35148e-10	1	1	206.288	77.607	139.651	62.1744	109.476	1084.05	474.195	861.772	119.039	806.672	6.77651	2.2987
ZMOp32x013	hypothetical protein	0	1	1	744.678	1112.71	800.047	1012.64	952.929	6063.97	3966.49	6494.61	924.601	5508.36	5.95755	3.56471
ZMOp39x029	hypothetical protein	0.00374353	0.996256	0.996256	109.476	109.476	62.1744	139.651	139.651	289.646	828.865	310.766	112.086	476.426	4.25054	2.07406
ZMOp33x036	ribonuclease toxin BrnT of type II toxin-antitoxin system	0.000159121	0.999841	0.999841	10372.4	3525.88	3525.88	2579.14	3630.43	19588.8	20457.2	16915.8	4726.76	18987.3	4.01698	1.63084
ZMOp32x017	DDE domain-containing transposase	0	1	1	350.9	410.903	429.839	453.41	289.646	1329.92	1479.68	1661.16	386.94	1490.25	3.85138	2.93315
ZMOp33x038	Lambda repressor-like transcriptional regulator	0	1	1	6263.28	3022.37	3966.49	3022.37	3283.06	15496.5	13018.8	13018.8	3911.51	13844.7	3.53947	2.07858
ZMOp32x015	Azospirillum phage Cd, Gp10	3.33067e-16	1	1	519.532	589.479	565.124	1285.81	1198.42	2835.18	2835.18	3142.25	831.673	2937.54	3.53209	2.20498
ZMOp36x042	putative ATPase terminase subunit protein	0	1	1	638.967	494.035	474.195	410.903	565.124	1520.64	1918.34	1993.86	516.645	1810.95	3.50521	2.37985
ZMOp33x037	Cro/C1-type transcriptional repressor	7.54993e-09	1	1	16915.8	6494.61	6820.07	6494.61	5103.11	28776.5	25378.2	30779.5	8365.65	28311.4	3.38425	1.50026
ZMOp32x008	PIN domain protein	0	1	1	21398	13645.4	10866.5	13645.4	12351.3	54938.7	43033.4	47894.7	14381.3	48622.2	3.38093	2.01109
ZMOp39x003	hypothetical protein	0	1	1	1918.34	1661.16	1624.35	1479.68	2417.06	6263.28	5259.68	6820.07	1820.12	6114.35	3.35931	2.17606
ZMOp36x006	Baseplate assembly protein J	0	1	1	767.574	542.886	453.41	519.532	717.087	2072.57	1624.35	2151.94	600.098	1949.62	3.24883	2.11621
ZMOp32x010	Macro or A1pp domain protein	0	1	1	3525.88	3209.28	3209.28	3709.06	3405.55	9677.78	11886	11286.2	3411.81	10950	3.20944	2.60922
ZMOp32x009	SinI-like DNA-binding domain protein	0	1	1	47894.7	37592.5	30779.5	33633	37592.5	106208	106208	106208	37498.5	106208	2.83233	2.21753
ZMOp36x007	tail protein I	1.51968e-06	0.999998	0.999998	186.629	226.117	171.312	250.03	186.629	519.532	519.532	429.839	204.143	489.634	2.39848	1.71915
ZMOp36x008	bulb-type lectin domain protein	0	1	1	1428.81	1428.81	1285.81	1084.05	1329.92	2949.98	2761.11	3022.37	1311.48	2911.15	2.21975	1.93246
ZMOp39x015	ABC transporte ATPase	0	1	1	3283.06	3283.06	4220.93	4485.62	3838.2	7723.61	7723.61	9677.78	3822.17	8375	2.19116	1.72186
ZMOp33x022	NADP-dependent oxidoreductase domain protein	1.4196e-09	1	1	7398.72	8065.25	8356.41	8356.41	8356.41	16257.2	16915.8	16257.2	8106.64	16476.7	2.0325	1.94547
ZMOp32x006	TonB-dependent receptor plug domain protein	0	1	1	3405.55	4601.88	4601.88	4330.95	4220.93	8709.04	8065.25	9006.29	4232.24	8593.52	2.03049	1.7526
ZMOp32x011	hypothetical protein	0	1	1	78282.5	78282.5	78282.5	78282.5	78282.5	135515	195338	135515	78282.5	155456	1.98583	1.7311
ZMOp39x034	XRE family transcriptional regulator	1.17211e-05	0.999988	0.999988	106208	135515	106208	135515	135515	67497.8	67497.8	67497.8	123792	67497.8	-1.83402	1.5735
ZMOp33x040	death on curing (Doc) protein	1.25873e-06	0.999999	0.999999	1993.86	1993.86	1918.34	2072.57	1786.89	952.929	1084.05	1112.71	1953.1	1049.9	-1.86028	1.60589
ZMOp39x010	Putative partitioning protein ParB	0	1	1	6063.97	7090.52	6263.28	6263.28	6494.61	3142.25	3283.06	3209.28	6435.14	3211.53	-2.00376	1.84705
ZMOp39x032	Winged helix-turn-helix DNA-binding domain protein	8.25956e-05	0.999917	0.999917	1285.81	1479.68	1715.52	1855.65	1242.28	744.678	800.047	589.479	1515.79	711.401	-2.13071	1.55276
ZMOp39x026	partitioning protein ParA ATPase	0	1	1	7723.61	10866.5	8709.04	8065.25	9006.29	4096.63	4485.62	3709.06	8874.13	4097.1	-2.16595	1.72186
ZMOp32x023	MTH538 TIR-like domain	1.42967e-05	0.999986	0.999986	135515	195338	195338	195338	195338	78282.5	78282.5	78282.5	183373	78282.5	-2.34245	1.7311
ZMOp36x013	Bacteriophage tail protein Gp41	0	1	1	2233.67	2326.01	2417.06	2761.11	2579.14	1112.71	589.479	1285.81	2463.4	995.999	-2.47329	1.73717
ZMOp36x039	CobQ/CobB/MinD/ParA nucleotide binding domain protein	1.16573e-14	1	1	6494.61	9677.78	8065.25	9313.78	9984.61	3838.2	3209.28	3405.55	8707.21	3484.34	-2.49895	1.6921
ZMOp39x021	death on curing (Doc) protein	0	1	1	6820.07	7723.61	7398.72	6820.07	7090.52	3209.28	2579.14	2661.56	7170.6	2816.66	-2.54578	2.12511
ZMOp36x036	winged helix-turn-helix DNA-binding domain protein	3.62961e-08	1	1	565.124	927.156	897.43	861.772	861.772	310.766	310.766	328.437	822.651	316.656	-2.59793	1.72065
ZMOp33x008	LysR family transcription regulator	0	1	1	3209.28	4912.59	4912.59	4096.63	3966.49	1624.35	1715.52	1378.24	4219.51	1572.7	-2.68297	1.87073
ZMOp33x039	hypothetical protein	0	1	1	5259.68	5259.68	5259.68	4912.59	5795.93	2233.67	1661.16	1715.52	5297.51	1870.12	-2.83272	2.19934
ZMOp36x027	hypothetical protein	0	1	1	3630.43	5404.82	4755.13	4755.13	4601.88	1661.16	1520.64	1329.92	4629.48	1503.91	-3.0783	2.18548
ZMOp39x020	hypothetical protein	0	1	1	9677.78	15007	9984.61	14277.3	11886	3966.49	4330.95	2949.98	12166.5	3749.14	-3.24516	2.23456
ZMOp33x025	Putative transposase IS4/IS5 family protein	0	1	1	4220.93	6063.97	5795.93	5404.82	5259.68	1786.89	1855.65	987.302	5349.07	1543.28	-3.46604	2.27464
ZMOp36x025	DNA-damage-inducible protein D	0	1	1	7090.52	9313.78	9677.78	9984.61	9677.78	2579.14	3022.37	1855.65	9148.9	2485.72	-3.68058	2.34602
ZMOp39x017	hypothetical protein	2.22045e-16	1	1	2539.65	3838.2	2579.14	2661.56	2500.16	828.865	565.124	744.678	2823.74	712.889	-3.96099	3.01637
ZMOp36x004	Bacteriophage tail completion protein R	0	1	1	1624.35	1786.89	1428.81	1329.92	1158.27	390.864	77.607	390.864	1465.65	286.445	-5.11667	2.96335
ZMOp36x010	Phage baseplate assembly protein V/Gp45	2.32488e-07	1	1	410.903	453.41	687.89	767.574	767.574	157.158	139.651	62.1744	617.47	119.661	-5.16015	2.61458
ZMOp39x018	secreted lipase	1.11022e-16	1	1	22642.2	43033.4	33633	37592.5	33633	7090.52	7398.72	5259.68	34106.8	6582.98	-5.18106	3.06028
ZMOp39x008	NAD(P)-dependent oxidoreductase	0	1	1	54938.7	60829.5	54938.7	54938.7	60829.5	10372.4	12351.3	8356.41	57295	10360.1	-5.53037	4.448
