# Supplementary material for: Complete genome sequence and the expression pattern of plasmids of the model ethanologen Zymomonas mobilis ZM4 and its xylose-utilizing derivatives 8b and 2032
Source: Biotechnol Biofuels. 2018 May 2;11:125. doi: 10.1186/s13068-018-1116-x (PMC5930841; doi:10.1186/s13068-018-1116-x)
Supplement: Supplementary file 8 — Additional file 8: Table S7. Proteomic data of ZM4 in ethanol shock and sodium acetate stress conditions. [file 13068_2018_1116_MOESM8_ESM.xlsx]

## Sheet: All Data
Plasmid Gene	PPEE	PPDE	CEBF	c1.ZM4_GLU_AE_BA_EXL_1.30_0_A_ANSUG	c1.ZM4_GLU_AE_BA_EXL_1.30_0_B_ANSUY	c1.ZM4_GLU_AE_BA_EXM_0.98_0_A_ANSUC	c1.ZM4_GLU_AE_BA_EXM_0.98_0_B_ANSUX	c2.ZM4_GLU_AN_BA_EXL_1.30_0_A_ANSTY	c2.ZM4_GLU_AN_BA_EXL_1.30_0_B_ANSUS	c2.ZM4_GLU_AN_BA_EXM_0.85_0_A_ANSTX	c2.ZM4_GLU_AN_BA_EXM_0.85_0_B_ANSUP	avg.c1.ZM4_GLU_AE	avg.c2.ZM4_GLU_AN	c2.ZM4_GLU_AN.vs..c1.ZM4_GLU_AE	crt.c2.ZM4_GLU_AN.c1.ZM4_GLU_AE
ZMOp32x001	0.94671	0.0532897	0.0532897	7723.61	9677.78	10372.4	13018.8	11286.2	21398	12351.3	16915.8	10198.1	15487.8	1.51869	0.866916
ZMOp32x002	0.435521	0.564479	0.564479	21398	21398	18584.1	28776.5	16915.8	18584.1	22642.2	23928.7	22539.2	20517.7	-1.09852	0.776645
ZMOp32x003	0.972009	0.027991	0.027991	3838.2	3966.49	3630.43	4912.59	6063.97	3966.49	4485.62	4220.93	4086.93	4684.25	1.14616	0.807412
ZMOp32x004	0.102793	0.897207	0.897207	16915.8	30779.5	20457.2	37592.5	54938.7	37592.5	54938.7	37592.5	26436.3	46265.6	1.75008	1
ZMOp32x005	0.9646	0.0354001	0.0354001	4220.93	7398.72	4096.63	7723.61	7090.52	6494.61	6820.07	7090.52	5859.97	6873.93	1.17303	0.840878
ZMOp32x006	0.0241507	0.975849	0.975849	1993.86	1918.34	2151.94	1855.65	2949.98	3209.28	2326.01	2500.16	1979.95	2746.36	1.38708	1.08089
ZMOp32x007	0.955014	0.0449862	0.0449862	1624.35	1715.52	1855.65	1378.24	2151.94	2326.01	1624.35	1520.64	1643.44	1905.74	1.1596	0.819468
ZMOp32x008	0.254866	0.745134	0.745134	15007	15007	13645.4	11886	9984.61	8709.04	9984.61	11886	13886.3	10141.1	-1.36932	1
ZMOp32x009	0.845898	0.154102	0.154102	78282.5	54938.7	47894.7	30779.5	47894.7	30779.5	23928.7	26796.2	52973.8	32349.8	-1.63753	0.642651
ZMOp32x010	9.3996e-05	0.999906	0.999906	1918.34	1993.86	2072.57	2072.57	2761.11	3142.25	2949.98	2661.56	2014.33	2878.72	1.42912	1.28419
ZMOp32x011	0.980469	0.0195306	0.0195306	54938.7	47894.7	78282.5	47894.7	78282.5	67497.8	67497.8	67497.8	57252.6	70194	1.22604	0.862234
ZMOp32x012	0.90274	0.0972598	0.0972598	565.124	1112.71	617.284	1158.27	542.886	687.89	687.89	744.678	863.346	665.836	-1.29663	0.758884
ZMOp32x013	0.82476	0.17524	0.17524	1329.92	2233.67	1715.52	2579.14	1624.35	1479.68	1661.16	1242.28	1964.56	1501.87	-1.30808	0.800596
ZMOp32x014	1	2.51425e-19	2.51425e-19	139.651	269.297	118.835	12.1003	10.2422	18.323	18.323	62.1744	134.971	27.2657	-4.95022	0.194618
ZMOp32x015	0.531214	0.468786	0.468786	1158.27	2072.57	1574.63	1993.86	1378.24	1012.64	1198.42	1198.42	1699.83	1196.93	-1.42016	0.840393
ZMOp32x016	0.970996	0.0290035	0.0290035	744.678	1329.92	828.865	1918.34	987.302	1378.24	987.302	1045.9	1205.45	1099.69	-1.09618	0.540309
ZMOp32x017	0.906624	0.0933761	0.0933761	328.437	310.766	429.839	638.967	410.903	350.9	542.886	638.967	427.002	485.914	1.13797	0.549168
ZMOp32x018	0.959788	0.0402118	0.0402118	2233.67	1855.65	2579.14	2151.94	2233.67	2579.14	2761.11	2326.01	2205.1	2474.98	1.12239	0.86605
ZMOp32x019	1	2.43605e-19	2.43605e-19	8.38416	15.2116	10.2422	12.1003	10.2422	18.323	18.323	4.95153	11.4846	12.9599	1.12847	0.32551
ZMOp32x020	0	1	1	60829.5	78282.5	54938.7	67497.8	26796.2	28776.5	33633	25378.2	65387.1	28646	-2.28259	1.63348
ZMOp32x021	0.188412	0.811588	0.811588	47894.7	67497.8	60829.5	60829.5	43033.4	47894.7	26796.2	22642.2	59262.9	35091.6	-1.6888	1
ZMOp32x022	0.970071	0.0299294	0.0299294	20457.2	26796.2	28776.5	43033.4	37592.5	54938.7	28776.5	54938.7	29765.8	44061.6	1.48028	0.668703
ZMOp32x023	0.980105	0.0198951	0.0198951	135515	135515	135515	135515	135515	195338	135515	195338	135515	165426	1.22072	1
ZMOp32x024	1	9.30421e-20	9.30421e-20	77.607	109.476	139.651	95.2068	109.476	109.476	118.835	48.3726	105.485	96.5399	-1.09266	0.653065
ZMOp32x025	0.977484	0.0225164	0.0225164	5589.84	7723.61	6494.61	11286.2	8709.04	10372.4	8065.25	9984.61	7773.56	9282.84	1.19416	0.714614
ZMOp32x026	1	2.17846e-19	2.17846e-19	8.38416	62.1744	10.2422	12.1003	10.2422	18.323	18.323	27.2452	23.2253	18.5333	-1.25316	0.30773
ZMOp32x027	1	1.13582e-19	1.13582e-19	48.3726	15.2116	35.124	62.1744	77.607	77.607	77.607	18.323	40.2207	62.786	1.56104	0.294703
ZMOp32x028	0.973529	0.0264712	0.0264712	2761.11	4220.93	3209.28	6494.61	5589.84	6263.28	4096.63	5404.82	4171.48	5338.64	1.2798	0.630773
ZMOp32x029	0.301772	0.698228	0.698228	118.835	95.2068	10.2422	109.476	48.3726	269.297	269.297	269.297	83.44	214.066	2.56551	0.407057
ZMOp33x001	0.138286	0.861714	0.861714	37592.5	22642.2	33633	21398	17629	16257.2	18584.1	16257.2	28816.4	17181.9	-1.67714	1.15141
ZMOp33x002	0.0199939	0.980006	0.980006	30779.5	33633	22642.2	26796.2	19588.8	23928.7	16915.8	19588.8	28462.7	20005.6	-1.42274	0.946234
ZMOp33x003	1	9.79169e-18	9.79169e-18	2417.06	2661.56	2661.56	2761.11	2500.16	2661.56	2233.67	2233.67	2625.32	2407.26	-1.09058	0.908137
ZMOp33x004	0.796913	0.203087	0.203087	22642.2	20457.2	19588.8	23928.7	20457.2	20457.2	20457.2	20457.2	21654.2	20457.2	-1.05852	0.957554
ZMOp33x005	0.0160042	0.983996	0.983996	67497.8	60829.5	43033.4	54938.7	33633	26796.2	47894.7	28776.5	56574.8	34275.1	-1.65061	0.8985
ZMOp33x006	0.00663585	0.993364	0.993364	18584.1	19588.8	14277.3	16257.2	13645.4	14277.3	15496.5	14277.3	17176.9	14424.1	-1.19084	0.921328
ZMOp33x007	0.988208	0.0117917	0.0117917	35.124	118.835	95.2068	171.312	269.297	18.323	226.117	118.835	105.12	158.143	1.50441	0.106956
ZMOp33x008	0.973496	0.0265036	0.0265036	6820.07	6263.28	7398.72	8709.04	8356.41	7723.61	8709.04	6820.07	7297.78	7902.28	1.08283	0.783103
ZMOp33x009	0.0425857	0.957414	0.957414	861.772	987.302	589.479	800.047	617.284	664.286	390.864	474.195	809.65	536.657	-1.50869	0.887387
ZMOp33x010	0.978911	0.0210895	0.0210895	2835.18	2579.14	2835.18	2661.56	3142.25	2949.98	2835.18	2579.14	2727.77	2876.64	1.05458	0.909692
ZMOp33x011	0.462859	0.537141	0.537141	16257.2	14277.3	15007	10372.4	10866.5	7398.72	9677.78	7723.61	13978.5	8916.65	-1.56768	0.954537
ZMOp33x012	0.797186	0.202814	0.202814	28776.5	37592.5	26796.2	19588.8	25378.2	19588.8	19588.8	17629	28188.5	20546.2	-1.37196	0.771876
ZMOp33x013	0.13496	0.86504	0.86504	10372.4	10866.5	9677.78	7090.52	7723.61	5589.84	6494.61	4755.13	9501.8	6140.8	-1.54732	0.918032
ZMOp33x014	0.654784	0.345216	0.345216	2661.56	3022.37	2417.06	2233.67	2417.06	2151.94	2151.94	1855.65	2583.66	2144.15	-1.20498	0.924125
ZMOp33x015	0.990477	0.00952319	0.00952319	15496.5	16915.8	16915.8	15007	18584.1	16915.8	15007	15007	16083.8	16378.5	1.01832	0.887154
ZMOp33x016	0.0676185	0.932382	0.932382	12351.3	13645.4	11286.2	12351.3	10372.4	9677.78	9006.29	9313.78	12408.6	9592.57	-1.29356	1.08809
ZMOp33x017	0.971006	0.0289944	0.0289944	3709.06	4912.59	3283.06	3709.06	5795.93	4601.88	3525.88	3283.06	3903.45	4301.69	1.10202	0.668296
ZMOp33x018	0.981944	0.0180564	0.0180564	7090.52	10372.4	8356.41	9677.78	8065.25	9006.29	7398.72	6263.28	8874.29	7683.39	-1.155	0.787286
ZMOp33x019	0.97513	0.0248704	0.0248704	26796.2	25378.2	30779.5	17629	28776.5	15496.5	21398	15496.5	25145.7	20291.9	-1.2392	0.612617
ZMOp33x020	4.25804e-10	1	1	6263.28	6494.61	5103.11	4601.88	4096.63	3630.43	3709.06	3709.06	5615.72	3786.3	-1.48317	1.12333
ZMOp33x021	9.81041e-10	1	1	25378.2	23928.7	17629	18584.1	11886	10866.5	10372.4	10866.5	21380	10997.8	-1.94402	1.48317
ZMOp33x022	2.74371e-05	0.999973	0.999973	8356.41	11886	5589.84	9006.29	3405.55	3838.2	3283.06	4330.95	8709.64	3714.44	-2.3448	1.29067
ZMOp33x023	1.77404e-07	1	1	13645.4	15496.5	8709.04	13645.4	6494.61	5404.82	5259.68	6063.97	12874.1	5805.77	-2.21746	1.34096
ZMOp33x024	2.53746e-05	0.999975	0.999975	1084.05	1158.27	1158.27	1242.28	687.89	828.865	565.124	565.124	1160.72	661.751	-1.75401	1.30787
ZMOp33x025	1.92568e-12	1	1	5795.93	4755.13	5795.93	4330.95	3209.28	2761.11	3405.55	3405.55	5169.49	3195.37	-1.6178	1.27173
ZMOp33x026	0.906161	0.0938388	0.0938388	5259.68	6063.97	3709.06	3966.49	3525.88	4485.62	5589.84	3022.37	4749.8	4155.93	-1.1429	0.663537
ZMOp33x027	0.00993256	0.990067	0.990067	7398.72	8065.25	5259.68	5404.82	4485.62	4220.93	6063.97	4485.62	6532.12	4814.03	-1.35689	0.867365
ZMOp33x028	6.0909e-07	0.999999	0.999999	3283.06	3838.2	2326.01	3022.37	1918.34	1993.86	1918.34	2151.94	3117.41	1995.62	-1.56212	1.08089
ZMOp33x029	0	1	1	2326.01	2761.11	1993.86	2417.06	1045.9	744.678	1012.64	800.047	2374.51	900.817	-2.63595	1.90636
ZMOp33x030	1.60272e-08	1	1	4601.88	4096.63	3405.55	3630.43	2072.57	2072.57	2661.56	2949.98	3933.62	2439.17	-1.61269	1.15443
ZMOp33x031	0.978045	0.0219553	0.0219553	195338	195338	195338	195338	195338	135515	195338	135515	195338	165426	-1.18081	1
ZMOp33x032	1	5.20424e-19	5.20424e-19	350.9	542.886	269.297	542.886	171.312	328.437	310.766	206.288	426.492	254.201	-1.67778	0.819935
ZMOp33x033	0.981661	0.0183389	0.0183389	4485.62	5795.93	6063.97	6263.28	4330.95	7090.52	4912.59	8709.04	5652.2	6260.78	1.10767	0.691483
ZMOp33x034	0.998813	0.00118735	0.00118735	1285.81	861.772	987.302	1012.64	828.865	1285.81	861.772	664.286	1036.88	910.183	-1.1392	0.670218
ZMOp33x035	0.806174	0.193826	0.193826	3630.43	2835.18	4755.13	2835.18	2579.14	2835.18	3142.25	3209.28	3513.98	2941.46	-1.19464	0.883434
ZMOp33x036	0.63234	0.36766	0.36766	9677.78	5404.82	6263.28	3405.55	3966.49	3283.06	3838.2	3142.25	6187.86	3557.5	-1.73938	0.858582
ZMOp33x037	7.70069e-07	0.999999	0.999999	10866.5	9313.78	9006.29	6063.97	5404.82	3405.55	5404.82	3838.2	8812.63	4513.35	-1.95257	1.12196
ZMOp33x038	0.831521	0.168479	0.168479	3405.55	2417.06	2500.16	1661.16	2326.01	1520.64	1993.86	1479.68	2495.99	1830.05	-1.36389	0.714169
ZMOp33x039	0.907224	0.0927757	0.0927757	9984.61	6820.07	9313.78	5259.68	15007	9984.61	11886	8065.25	7844.54	11235.7	1.4323	0.807768
ZMOp33x040	0.897282	0.102718	0.102718	4330.95	3142.25	4330.95	2500.16	5103.11	4330.95	4220.93	3966.49	3576.08	4405.37	1.2319	0.915846
ZMOp36x001	0.996918	0.00308213	0.00308213	494.035	390.864	494.035	453.41	589.479	429.839	519.532	390.864	458.086	482.429	1.05314	0.791168
ZMOp36x002	0.989909	0.0100912	0.0100912	310.766	494.035	453.41	429.839	370.074	370.074	171.312	350.9	422.013	315.59	-1.33722	0.83974
ZMOp36x003	0.998862	0.00113787	0.00113787	289.646	77.607	186.629	186.629	289.646	171.312	186.629	171.312	185.127	204.725	1.10586	0.591456
ZMOp36x004	0.929954	0.0700458	0.0700458	1378.24	687.89	1084.05	565.124	800.047	1198.42	1084.05	1084.05	928.827	1041.64	1.12146	0.580483
ZMOp36x005	0.936254	0.0637459	0.0637459	1786.89	952.929	1786.89	861.772	1715.52	1428.81	1855.65	1918.34	1347.12	1729.58	1.28391	0.799605
ZMOp36x006	0.926693	0.073307	0.073307	542.886	410.903	565.124	410.903	390.864	494.035	410.903	542.886	482.454	459.672	-1.04956	0.756886
ZMOp36x007	0.966931	0.0330685	0.0330685	206.288	350.9	157.158	310.766	206.288	139.651	250.03	226.117	256.278	205.522	-1.24696	0.628557
ZMOp36x008	0.95811	0.0418905	0.0418905	1012.64	927.156	1378.24	927.156	1198.42	1329.92	952.929	1329.92	1061.3	1202.8	1.13332	0.691408
ZMOp36x009	0.95064	0.0493599	0.0493599	1479.68	1198.42	1045.9	1786.89	1285.81	1045.9	1285.81	1574.63	1377.72	1298.04	-1.06139	0.66422
ZMOp36x010	0.952401	0.0475993	0.0475993	410.903	519.532	542.886	494.035	429.839	390.864	453.41	589.479	491.839	465.898	-1.05568	0.697061
ZMOp36x011	0.958575	0.0414255	0.0414255	589.479	638.967	744.678	717.087	638.967	453.41	638.967	952.929	672.553	671.068	-1.00221	0.618597
ZMOp36x012	0.73897	0.26103	0.26103	617.284	617.284	664.286	687.89	927.156	717.087	767.574	1158.27	646.686	892.521	1.38015	1.04244
ZMOp36x013	0.941574	0.0584262	0.0584262	2151.94	2151.94	2233.67	2326.01	2661.56	2417.06	2500.16	2761.11	2215.89	2584.97	1.16656	1.03915
ZMOp36x014	1	1.314e-19	1.314e-19	171.312	15.2116	171.312	77.607	10.2422	18.323	139.651	109.476	108.861	69.4232	-1.56808	0.108926
ZMOp36x015	0.880628	0.119372	0.119372	1520.64	1428.81	1624.35	1479.68	1661.16	1624.35	1786.89	1993.86	1513.37	1766.57	1.16731	1
ZMOp36x016	0.710368	0.289632	0.289632	767.574	744.678	687.89	664.286	897.43	767.574	927.156	897.43	716.107	872.397	1.21825	1
ZMOp36x017	0.350257	0.649743	0.649743	1242.28	1045.9	1479.68	1198.42	1428.81	1574.63	1715.52	1715.52	1241.57	1608.62	1.29563	0.965621
ZMOp36x018	0.013707	0.986293	0.986293	4755.13	3209.28	4601.88	4220.93	7398.72	5259.68	7090.52	8356.41	4196.8	7026.33	1.67421	1.10611
ZMOp36x019	0.840884	0.159116	0.159116	1715.52	1786.89	1661.16	1285.81	1479.68	1715.52	2417.06	2417.06	1612.35	2007.33	1.24498	0.828073
ZMOp36x020	0.290943	0.709057	0.709057	3209.28	2500.16	2949.98	2949.98	3283.06	4096.63	4601.88	4912.59	2902.35	4223.54	1.45521	1.02299
ZMOp36x021	0.952847	0.0471525	0.0471525	157.158	186.629	226.117	118.835	118.835	250.03	157.158	157.158	172.185	170.795	-1.00813	0.475282
ZMOp36x022	0.887587	0.112413	0.112413	390.864	226.117	519.532	519.532	519.532	226.117	664.286	519.532	414.011	482.367	1.16511	0.435232
ZMOp36x023	0.840177	0.159823	0.159823	1428.81	897.43	1112.71	987.302	861.772	589.479	589.479	861.772	1106.56	725.625	-1.52498	1.04138
ZMOp36x024	0.96432	0.0356799	0.0356799	8065.25	5589.84	6820.07	4096.63	6263.28	6063.97	7723.61	4601.88	6142.95	6163.19	1.00329	0.570581
ZMOp36x025	0.269281	0.730719	0.730719	6063.97	8709.04	7723.61	10866.5	13018.8	15007	9313.78	13645.4	8340.77	12746.2	1.52818	0.857113
ZMOp36x026	1	2.43605e-19	2.43605e-19	8.38416	15.2116	10.2422	12.1003	10.2422	18.323	18.323	4.95153	11.4846	12.9599	1.12847	0.32551
ZMOp36x027	0.0379143	0.962086	0.962086	2500.16	2949.98	3525.88	3142.25	4755.13	6820.07	5103.11	6494.61	3029.57	5793.23	1.91223	1.34864
ZMOp36x028	0.847359	0.152641	0.152641	8709.04	7090.52	9984.61	9313.78	9006.29	13018.8	11286.2	11286.2	8774.49	11149.3	1.27065	0.902016
ZMOp36x029	0.894312	0.105688	0.105688	19588.8	16257.2	25378.2	25378.2	23928.7	33633	30779.5	47894.7	21650.6	34059	1.57312	0.942885
ZMOp36x030	0.050265	0.949735	0.949735	23928.7	17629	23928.7	22642.2	30779.5	43033.4	43033.4	60829.5	22032.2	44418.9	2.0161	1.2863
ZMOp36x031	0.931482	0.0685183	0.0685183	17629	18584.1	21398	20457.2	21398	25378.2	25378.2	43033.4	19517.1	28796.9	1.47547	1
ZMOp36x032	0.875587	0.124413	0.124413	43033.4	28776.5	37592.5	33633	22642.2	22642.2	37592.5	33633	35758.9	29127.5	-1.22767	0.765485
ZMOp36x033	0.943428	0.0565716	0.0565716	2072.57	1520.64	1242.28	744.678	1329.92	1158.27	1520.64	1285.81	1395.04	1323.66	-1.05393	0.489712
ZMOp36x034	0.90543	0.0945699	0.0945699	1045.9	589.479	390.864	289.646	1112.71	800.047	474.195	328.437	578.972	678.847	1.1725	0.314024
ZMOp36x035	0.990121	0.00987902	0.00987902	474.195	565.124	474.195	139.651	453.41	289.646	429.839	289.646	413.291	365.635	-1.13034	0.308002
ZMOp36x036	0.967175	0.0328253	0.0328253	1661.16	1574.63	1198.42	1084.05	1574.63	1855.65	1378.24	1428.81	1379.56	1559.33	1.13031	0.829686
ZMOp36x037	0.977303	0.0226969	0.0226969	3022.37	4485.62	4485.62	5795.93	4220.93	5795.93	3966.49	5795.93	4447.38	4944.82	1.11185	0.684357
ZMOp36x038	0.9586	0.0413996	0.0413996	33633	43033.4	67497.8	78282.5	60829.5	78282.5	78282.5	106208	55611.7	80900.6	1.45474	0.777051
ZMOp36x039	0.375655	0.624345	0.624345	13018.8	13018.8	13018.8	15496.5	16257.2	17629	16257.2	21398	13638.2	17885.3	1.31141	1.04909
ZMOp36x040	0.971912	0.0280878	0.0280878	3525.88	3525.88	3838.2	4485.62	3709.06	3525.88	5795.93	5103.11	3843.9	4533.5	1.1794	0.786041
ZMOp36x041	0.957575	0.0424253	0.0424253	800.047	800.047	897.43	828.865	1158.27	987.302	1112.71	717.087	831.597	993.841	1.1951	0.799045
ZMOp36x042	8.36968e-05	0.999916	0.999916	453.41	429.839	370.074	350.9	474.195	542.886	494.035	429.839	401.056	485.239	1.2099	0.948013
ZMOp36x043	0.911456	0.0885437	0.0885437	269.297	328.437	250.03	206.288	226.117	157.158	350.9	370.074	263.513	276.062	1.04762	0.478503
ZMOp36x044	0.974749	0.0252515	0.0252515	519.532	474.195	350.9	474.195	350.9	410.903	370.074	410.903	454.705	385.695	-1.17892	0.853973
ZMOp36x045	0.635879	0.364121	0.364121	226.117	453.41	328.437	250.03	310.766	474.195	328.437	494.035	314.499	401.858	1.27777	0.685397
ZMOp36x046	1	4.64806e-20	4.64806e-20	186.629	289.646	310.766	226.117	328.437	310.766	206.288	139.651	253.289	246.286	-1.02844	0.568233
ZMOp36x047	1	2.4005e-19	2.4005e-19	8.38416	15.2116	62.1744	12.1003	62.1744	18.323	18.323	35.124	24.4676	33.4861	1.36859	0.294703
ZMOp39x001	1	2.43605e-19	2.43605e-19	8.38416	15.2116	10.2422	12.1003	10.2422	18.323	18.323	4.95153	11.4846	12.9599	1.12847	0.32551
ZMOp39x002	0.943537	0.0564634	0.0564634	62.1744	157.158	10.2422	269.297	157.158	95.2068	18.323	186.629	124.718	114.329	-1.09087	0.0548801
ZMOp39x003	0.0138284	0.986172	0.986172	828.865	664.286	717.087	589.479	744.678	1084.05	1428.81	1012.64	699.929	1067.54	1.52522	0.89843
ZMOp39x004	0.891873	0.108127	0.108127	2579.14	3283.06	4220.93	4755.13	3630.43	8065.25	4755.13	7398.72	3709.57	5962.38	1.6073	0.763476
ZMOp39x005	0.961201	0.0387995	0.0387995	5404.82	4330.95	3966.49	3283.06	4912.59	5103.11	3022.37	3630.43	4246.33	4167.12	-1.01901	0.643345
ZMOp39x006	0.898888	0.101112	0.101112	4096.63	3405.55	2761.11	3209.28	3022.37	3022.37	3209.28	3525.88	3368.14	3194.97	-1.0542	0.783097
ZMOp39x007	0.900022	0.0999781	0.0999781	2949.98	2326.01	3022.37	3838.2	2835.18	2500.16	2579.14	2835.18	3034.14	2687.42	-1.12902	0.820407
ZMOp39x008	9.46317e-06	0.999991	0.999991	11886	12351.3	15496.5	16915.8	67497.8	60829.5	60829.5	30779.5	14162.4	54984.1	3.88239	1.81957
ZMOp39x009	0.987744	0.0122558	0.0122558	14277.3	11286.2	16257.2	14277.3	14277.3	11286.2	17629	18584.1	14024.5	15444.2	1.10123	0.694228
ZMOp39x010	0.971886	0.028114	0.028114	3966.49	4601.88	5404.82	5103.11	5259.68	3709.06	6263.28	5259.68	4769.07	5122.93	1.0742	0.686251
ZMOp39x011	0.971369	0.0286314	0.0286314	5103.11	3630.43	4912.59	6820.07	3838.2	4755.13	4330.95	5589.84	5116.55	4628.53	-1.10544	0.64947
ZMOp39x012	0.969792	0.0302081	0.0302081	1112.71	828.865	861.772	952.929	1012.64	1242.28	1158.27	767.574	939.069	1045.19	1.11301	0.689825
ZMOp39x013	0.0501513	0.949849	0.949849	717.087	717.087	767.574	767.574	952.929	861.772	897.43	987.302	742.33	924.858	1.24588	1.12272
ZMOp39x014	0.854554	0.145446	0.145446	687.89	767.574	800.047	897.43	1084.05	897.43	828.865	828.865	788.235	909.802	1.15423	0.923599
ZMOp39x015	0.600539	0.399461	0.399461	1198.42	1661.16	1329.92	1715.52	1855.65	1918.34	1479.68	1661.16	1476.26	1728.71	1.17101	0.862525
ZMOp39x016	0.179963	0.820037	0.820037	952.929	1242.28	1520.64	1520.64	1786.89	1786.89	1574.63	1786.89	1309.12	1733.83	1.32442	1.0355
ZMOp39x017	0.960385	0.0396149	0.0396149	927.156	1285.81	1285.81	1112.71	1520.64	1661.16	1045.9	1624.35	1152.87	1463.01	1.26902	0.813417
ZMOp39x018	0.82744	0.17256	0.17256	4912.59	5259.68	7090.52	7398.72	6820.07	8356.41	8356.41	9006.29	6165.38	8134.8	1.31943	0.921791
ZMOp39x019	0.837641	0.162359	0.162359	109.476	15.2116	77.607	12.1003	139.651	206.288	18.323	77.607	53.5987	110.467	2.06101	0.16737
ZMOp39x020	0.675373	0.324627	0.324627	9313.78	8356.41	12351.3	8065.25	15496.5	12351.3	13645.4	12351.3	9521.7	13461.1	1.41373	1
ZMOp39x021	0.00464761	0.995352	0.995352	6494.61	5103.11	8065.25	5589.84	9313.78	9313.78	10866.5	9677.78	6313.2	9792.95	1.55119	1.1548
ZMOp39x022	0.712677	0.287323	0.287323	664.286	206.288	410.903	328.437	565.124	638.967	717.087	453.41	402.479	593.647	1.47498	0.682553
ZMOp39x023	0.900452	0.0995477	0.0995477	429.839	370.074	638.967	617.284	494.035	617.284	617.284	687.89	514.041	604.123	1.17524	0.773178
ZMOp39x024	0.967767	0.0322332	0.0322332	638.967	1012.64	952.929	1045.9	767.574	952.929	1242.28	1112.71	912.61	1018.87	1.11644	0.73389
ZMOp39x025	0.981823	0.0181775	0.0181775	897.43	1084.05	927.156	1329.92	1242.28	927.156	1329.92	1378.24	1059.64	1219.4	1.15077	0.697152
ZMOp39x026	0.901285	0.0987153	0.0987153	9006.29	9006.29	10866.5	8356.41	9677.78	13645.4	13018.8	10372.4	9308.86	11678.6	1.25457	0.89061
ZMOp39x027	0.797199	0.202801	0.202801	1855.65	1378.24	1918.34	1624.35	1993.86	2233.67	2072.57	2072.57	1694.14	2093.16	1.23553	1.03937
ZMOp39x028	0.982401	0.0175989	0.0175989	370.074	250.03	206.288	390.864	250.03	519.532	289.646	310.766	304.314	342.493	1.12546	0.639685
ZMOp39x029	0.943267	0.056733	0.056733	95.2068	139.651	109.476	157.158	95.2068	186.629	109.476	95.2068	125.373	121.63	-1.03078	0.51014
ZMOp39x030	0.920473	0.0795271	0.0795271	11286.2	9984.61	11886	9984.61	12351.3	11886	14277.3	13018.8	10785.4	12883.4	1.19452	1
ZMOp39x031	0.912073	0.0879272	0.0879272	3142.25	3709.06	3142.25	3525.88	4601.88	4912.59	3630.43	4096.63	3379.86	4310.38	1.27531	0.978799
ZMOp39x032	0.233603	0.766397	0.766397	987.302	1479.68	1428.81	1574.63	717.087	1112.71	744.678	927.156	1367.6	875.407	-1.56225	0.887296
ZMOp39x033	1	5.588e-10	5.588e-10	1574.63	1624.35	1012.64	1428.81	664.286	565.124	800.047	617.284	1410.11	661.685	-2.13108	1.26573
ZMOp39x034	0.989929	0.0100709	0.0100709	106208	106208	106208	106208	106208	106208	106208	78282.5	106208	99226.5	-1.07036	1

## Sheet: All Responsive
Plasmid Gene	Product	PPEE	PPDE	CEBF	c1.ZM4_GLU_AE_BA_EXL_1.30_0_A_ANSUG	c1.ZM4_GLU_AE_BA_EXL_1.30_0_B_ANSUY	c1.ZM4_GLU_AE_BA_EXM_0.98_0_A_ANSUC	c1.ZM4_GLU_AE_BA_EXM_0.98_0_B_ANSUX	c2.ZM4_GLU_AN_BA_EXL_1.30_0_A_ANSTY	c2.ZM4_GLU_AN_BA_EXL_1.30_0_B_ANSUS	c2.ZM4_GLU_AN_BA_EXM_0.85_0_A_ANSTX	c2.ZM4_GLU_AN_BA_EXM_0.85_0_B_ANSUP	avg.c1.ZM4_GLU_AE	avg.c2.ZM4_GLU_AN	c2.ZM4_GLU_AN.vs..c1.ZM4_GLU_AE	crt.c2.ZM4_GLU_AN.c1.ZM4_GLU_AE
ZMOp39x008	NAD(P)-dependent oxidoreductase	9.46317e-06	0.999991	0.999991	11886	12351.3	15496.5	16915.8	67497.8	60829.5	60829.5	30779.5	14162.4	54984.1	3.88239	1.81957
ZMOp32x020	MazE antitoxin	0	1	1	60829.5	78282.5	54938.7	67497.8	26796.2	28776.5	33633	25378.2	65387.1	28646	-2.28259	1.63348
ZMOp33x029	Azospirillum phage Cd Gp10 family protein	0	1	1	2326.01	2761.11	1993.86	2417.06	1045.9	744.678	1012.64	800.047	2374.51	900.817	-2.63595	1.90636
