# Supplementary material for: Complete genome sequence and the expression pattern of plasmids of the model ethanologen Zymomonas mobilis ZM4 and its xylose-utilizing derivatives 8b and 2032
Source: Biotechnol Biofuels. 2018 May 2;11:125. doi: 10.1186/s13068-018-1116-x (PMC5930841; doi:10.1186/s13068-018-1116-x)
Supplement: Supplementary file 9 — Additional file 9: Table S8. Proteomic data of ZM4 in anaerobic and aerobic fermentation in rich and minimal media. [file 13068_2018_1116_MOESM9_ESM.xlsx]

## Sheet: Sheet1
ID	Protein Description	F1	F2	F3	F4_1	F4_2	LogF2F5	LogF3F6	StationaryF2F5	StationaryF3F6
{ZMO1234, ZMO1598}	1-deoxy-D-xylulose-5-phosphate synthase	5	6		2		3	2	2	4
ZMO0249	50S ribosomal protein L33	5	4	6			3	4	4	5
ZMOp32x001	SIR2-like protein			2
ZMOp32x002	RelB or DinJ-like antitoxin		2	2
ZMOp32x004	P-loop containing nucleoside triphosphate hydrolase domain protein	2	2		2		2	6	4	5
ZMOp32x005	hypothetical protein	3	3	3			3	4	4	4
ZMOp32x008	PIN domain						2	3		2
ZMOp32x009	SinI-like, DNA-binding domain	4	4	4	2		3	3	3	3
ZMOp32x011	hypothetical protein	5	8	7	5	5	3	3	3	5
ZMOp32x013	hypothetical protein		3	2
ZMOp32x021	MazF toxin	2	2	8
ZMOp32x024	phage integrase	5	2	7	3	3				3
ZMOp32x026	hypothetical protein		2	2			9	4	5	9
ZMOp33x003	CopG family transcriptional regulator		2	2	2	2
ZMOp33x004	CobQ/CobB/MinD/ParA nucleotide binding domain protein	4	3	4	2	3	2	2	3	5
ZMOp33x006	Acyl-CoA N-acyltransferase						2	2	3	3
ZMOp33x011	carbamoylase-type amidase									2
ZMOp33x012	2-aminoethylphosphonate--pyruvate transaminase	2					6	3	2	2
ZMOp33x015	AtzE type amidohydrolase			2			3	3	2	2
ZMOp33x021	alcohol dehydrogenase-like protein	2	2				4	2	2	2
ZMOp33x023	NADP-dependent oxidoreductase domain protein	3		5			11	8	8	8
ZMOp33x027	relaxosome protein TraY			2
ZMOp33x030	hypothetical protein			1
ZMOp33x031	hypothetical protein			2				3	2	2
ZMOp33x039	hypothetical protein	1		1
ZMOp39x004	hypothetical protein		2	2		2
ZMOp39x005	RelB antitoxin/Antitoxin DinJ family toxin	3	3		2
ZMOp39x007	TonB-dependent receptor beta-barrel protein						2	2
ZMOp39x008	NAD(P)-dependent oxidoreductase	12	11	14	8	12	11	12	10	14
ZMOp39x009	putative partitioning protein ParA ATPase						4	5		4
ZMOp39x010	putative partitioning protein ParB		3		2	2			2
ZMOp39x015	ABC transporte ATPase							3	2	3
ZMOp39x016	ABC transporter permease							2	2
ZMOp39x018	secreted lipase	3	5	5	2	3	2		2	3
ZMOp39x020	hypothetical protein							1
ZMOp39x025	DNA partition complex, ParG / Arc-type ribbon-helix-helix			2
ZMOp39x031	Alpha/Beta hydrolase fold		2				2
ZMOp39x034	XRE family transcriptional regulator	5	4	11	3	4	5	7	5	9
ZMOp41x009/ZMOp36x009	hypothetical protein			2
ZMOp41x018/ZMOp36x018	hypothetical protein		3	3
ZMOp41x025/ZMOp36x025	DNA-damage-inducible protein D			4			2		3	6
ZMOp41x028/ZMOp36x028	hypothetical protein	4	6	5	2	4	5	9	6	7
ZMOp41x029/ZMOp36x029	Lambda repressor-like DNA-binding domain protein							2
ZMOp41x031/ZMOp36x031	helix-turn-helix XRE super family protein			3
ZMOp41x032/ZMOp36x032	hypothetical protein	2	2	3		2
ZMOp41x037/ZMOp36x037	abortive infection system protein AbiD/AbiF-like protein							2	2
ZMOp41x039/ZMOp36x039	CobQ/CobB/MinD/ParA nucleotide binding domain						2	3		3
ZMOp41x040/ZMOp36x040	Arc-type ribbon-helix-helix		3	4				3	3
ZMOp41x043/ZMOp36x043	capsid scaffolding protein GpO			4
ZMOp41x044/ZMOp36x044	bacteriophage P2 GpN major capsid	2	3	3
