# Supplementary material for: Complete genome sequence and the expression pattern of plasmids of the model ethanologen Zymomonas mobilis ZM4 and its xylose-utilizing derivatives 8b and 2032
Source: Biotechnol Biofuels. 2018 May 2;11:125. doi: 10.1186/s13068-018-1116-x (PMC5930841; doi:10.1186/s13068-018-1116-x)
Supplement: Supplementary file 10 — Additional file 10: Table S9. Assignments of plasmid genes to expression clusters identified by inter-center expression meta-analysis (see Additional file 1: Figure S3). [file 13068_2018_1116_MOESM10_ESM.xlsx]

## Sheet: Sample key
Sample #	Sample description
1	Rich medium, anaerobic, mid-log
2	Rich medium, anaerobic, stationary
3	Rich medium, anaerobic, mid-log
4	Rich medium, anaerobic, stationary
5	Minimal medium, anaerobic, mid-log
6	Minimal medium, anaerobic, stationary
7	Minimal medium, anaerobic, mid-log
8	Minimal medium, anaerobic, stationary
9	Minimal medium, aerobic, mid-log
10	Minimal medium, aerobic, mid-log
11	Minimal medium, aerobic, stationary
12	Minimal medium, aerobic, mid-log
13	Minimal medium, aerobic, stationary
14	Minimal medium, aerobic, mid-log
15	Minimal medium, aerobic, stationary
16	Minimal medium, anaerobic, mid-log
17	Minimal medium, anaerobic, stationary
18	Rich medium, anaerobic, mid-log
19	Rich medium, anaerobic, stationary

## Sheet: Plasmid genes
Protein IDs	Peptide counts (all)	Peptide counts (razor+unique)	Peptide counts (unique)	Number of proteins	Peptides	Razor + unique peptides	Unique peptides	Peptides 1	Peptides 10	Peptides 11	Peptides 12	Peptides 13	Peptides 14	Peptides 15	Peptides 16	Peptides 17	Peptides 18	Peptides 19	Peptides 2	Peptides 3	Peptides 4	Peptides 5	Peptides 6	Peptides 7	Peptides 8	Peptides 9	Razor + unique peptides 1	Razor + unique peptides 10	Razor + unique peptides 11	Razor + unique peptides 12	Razor + unique peptides 13	Razor + unique peptides 14	Razor + unique peptides 15	Razor + unique peptides 16	Razor + unique peptides 17	Razor + unique peptides 18	Razor + unique peptides 19	Razor + unique peptides 2	Razor + unique peptides 3	Razor + unique peptides 4	Razor + unique peptides 5	Razor + unique peptides 6	Razor + unique peptides 7	Razor + unique peptides 8	Razor + unique peptides 9	Unique peptides 1	Unique peptides 10	Unique peptides 11	Unique peptides 12
ZMOp32x001	23	23	23	1	23	23	23	12	3	2	3	2	5	1	13	11	12	2	3	6	3	8	18	9	7	0	12	3	2	3	2	5	1	13	11	12	2	3	6	3	8	18	9	7	0	12	3	2	3
ZMOp32x004	12	12	12	1	12	12	12	7	9	8	9	8	8	7	10	9	9	9	7	7	8	9	6	11	8	8	7	9	8	9	8	8	7	10	9	9	9	7	7	8	9	6	11	8	8	7	9	8	9
ZMOp32x005	1	1	1	1	1	1	1	0	0	1	0	1	1	1	0	0	0	0	0	0	1	1	1	0	1	1	0	0	1	0	1	1	1	0	0	0	0	0	0	1	1	1	0	1	1	0	0	1	0
ZMOp33x007	7	7	7	1	7	7	7	4	4	5	4	2	3	4	5	3	2	2	2	3	4	5	0	4	2	3	4	4	5	4	2	3	4	5	3	2	2	2	3	4	5	0	4	2	3	4	4	5	4
ZMOp33x008	5	5	5	1	5	5	5	5	4	5	5	5	5	5	5	5	5	5	4	5	5	5	4	4	4	5	5	4	5	5	5	5	5	5	5	5	5	4	5	5	5	4	4	4	5	5	4	5	5
ZMOp33x009	7	7	7	1	7	7	7	4	5	5	5	6	3	3	3	2	1	1	2	4	4	3	5	4	6	7	4	5	5	5	6	3	3	3	2	1	1	2	4	4	3	5	4	6	7	4	5	5	5
ZMOp33x011	10	10	10	1	10	10	10	9	9	9	9	9	9	7	7	8	9	10	9	8	9	8	9	9	8	8	9	9	9	9	9	9	7	7	8	9	10	9	8	9	8	9	9	8	8	9	9	9	9
ZMOp32x021	10	10	10	1	10	10	10	9	8	8	8	7	8	9	8	8	9	9	8	8	8	8	8	8	7	7	9	8	8	8	7	8	9	8	8	9	9	8	8	8	8	8	8	7	7	9	8	8	8
ZMOp32x023	20	20	20	1	20	20	20	15	15	14	15	15	13	13	14	15	14	12	16	16	16	16	17	14	14	14	15	15	14	15	15	13	13	14	15	14	12	16	16	16	16	17	14	14	14	15	15	14	15
ZMOp32x024	12	12	12	1	12	12	12	11	11	9	10	10	11	9	11	11	12	12	12	11	11	11	11	11	11	11	11	11	9	10	10	11	9	11	11	12	12	12	11	11	11	11	11	11	11	11	11	9	10
ZMOp32x026	75	75	75	1	75	75	75	51	60	55	63	55	60	51	59	59	46	45	51	49	45	62	66	61	59	57	51	60	55	63	55	60	51	59	59	46	45	51	49	45	62	66	61	59	57	51	60	55	63
ZMOp32x029	26	26	26	1	26	26	26	19	19	17	17	16	17	18	19	21	19	19	16	20	18	24	25	24	23	13	19	19	17	17	16	17	18	19	21	19	19	16	20	18	24	25	24	23	13	19	19	17	17
ZMOp33x001	3	3	3	1	3	3	3	2	1	1	2	1	1	1	2	2	3	2	1	2	1	3	2	0	1	1	2	1	1	2	1	1	1	2	2	3	2	1	2	1	3	2	0	1	1	2	1	1	2
ZMOp33x002; ZMOp39x023	9;3	9;3	9;3	2	9	9	9	0	7	8	5	9	5	6	5	3	0	2	1	1	3	6	7	4	4	5	0	7	8	5	9	5	6	5	3	0	2	1	1	3	6	7	4	4	5	0	7	8	5
ZMOp33x003	4	4	4	1	4	4	4	4	4	4	4	4	4	4	4	4	4	4	4	4	4	4	4	4	4	4	4	4	4	4	4	4	4	4	4	4	4	4	4	4	4	4	4	4	4	4	4	4	4
ZMOp33x004	14	14	14	1	14	14	14	11	12	13	12	12	11	12	10	12	9	11	11	8	10	10	8	11	12	12	11	12	13	12	12	11	12	10	12	9	11	11	8	10	10	8	11	12	12	11	12	13	12
ZMOp33x006	5	5	5	1	5	5	5	0	3	5	2	2	3	5	1	2	3	3	1	2	3	4	5	2	3	4	0	3	5	2	2	3	5	1	2	3	3	1	2	3	4	5	2	3	4	0	3	5	2
ZMOp33x008	10	10	10	1	10	10	10	7	6	3	5	7	6	6	10	9	6	7	6	7	7	9	10	10	9	5	7	6	3	5	7	6	6	10	9	6	7	6	7	7	9	10	10	9	5	7	6	3	5
ZMOp33x011	12	12	12	1	12	12	12	5	7	10	10	8	9	9	6	5	5	4	3	5	7	6	6	6	3	7	5	7	10	10	8	9	9	6	5	5	4	3	5	7	6	6	6	3	7	5	7	10	10
ZMOp33x012	24	24	24	1	24	24	24	17	23	24	23	23	23	23	21	20	18	17	17	15	17	22	19	22	20	24	17	23	24	23	23	23	23	21	20	18	17	17	15	17	22	19	22	20	24	17	23	24	23
ZMOp33x015	17	17	17	1	17	17	17	10	15	17	16	17	16	16	13	13	12	11	10	10	13	14	13	11	13	16	10	15	17	16	17	16	16	13	13	12	11	10	10	13	14	13	11	13	16	10	15	17	16
ZMOp33x016	7	7	7	1	7	7	7	1	4	3	4	4	5	2	1	1	2	1	1	0	1	2	0	1	1	4	1	4	3	4	4	5	2	1	1	2	1	1	0	1	2	0	1	1	4	1	4	3	4
ZMOp33x018	15	15	15	1	15	15	15	9	10	10	11	13	12	14	11	9	10	8	8	7	10	9	8	10	12	11	9	10	10	11	13	12	14	11	9	10	8	8	7	10	9	8	10	12	11	9	10	10	11
ZMOp33x019	7	7	7	1	7	7	7	4	5	6	4	5	5	5	4	5	6	4	3	4	4	6	5	5	5	3	4	5	6	4	5	5	5	4	5	6	4	3	4	4	6	5	5	5	3	4	5	6	4
ZMOp33x021	19	19	19	1	19	19	19	12	17	19	16	17	18	17	15	15	12	13	13	9	14	17	15	17	14	17	12	17	19	16	17	18	17	15	15	12	13	13	9	14	17	15	17	14	17	12	17	19	16
ZMOp33x022	16	16	16	1	16	16	16	4	13	15	13	13	13	15	8	6	4	4	3	3	4	6	5	4	7	15	4	13	15	13	13	13	15	8	6	4	4	3	3	4	6	5	4	7	15	4	13	15	13
ZMOp33x023	26	26	26	1	26	26	26	16	19	21	20	23	21	22	17	18	15	15	17	14	15	14	17	16	16	23	16	19	21	20	23	21	22	17	18	15	15	17	14	15	14	17	16	16	23	16	19	21	20
ZMOp33x025	2	2	1	1	2	2	1	0	0	0	0	0	0	0	0	0	0	2	0	0	1	0	0	0	0	0	0	0	0	0	0	0	0	0	0	0	2	0	0	1	0	0	0	0	0	0	0	0	0
ZMOp33x026	6	6	6	1	6	6	6	5	5	4	4	3	4	4	3	4	3	4	3	3	5	4	3	3	5	6	5	5	4	4	3	4	4	3	4	3	4	3	3	5	4	3	3	5	6	5	5	4	4
ZMOp33x029	4	4	1	1	4	4	1	4	2	2	2	2	3	2	1	1	2	2	2	2	4	3	2	1	2	2	4	2	2	2	2	3	2	1	1	2	2	2	2	4	3	2	1	2	2	1	1	1	1
ZMOp33x031	12	12	11	1	12	12	11	9	6	8	7	8	9	10	10	9	8	10	8	9	9	9	10	8	8	6	9	6	8	7	8	9	10	10	9	8	10	8	9	9	9	10	8	8	6	8	5	7	6
ZMOp33x036	2	2	2	1	2	2	2	1	2	2	2	2	1	1	1	1	0	1	0	0	0	1	1	0	1	2	1	2	2	2	2	1	1	1	1	0	1	0	0	0	1	1	0	1	2	1	2	2	2
ZMOp36x008	5	5	5	1	5	5	5	1	1	2	2	1	2	1	1	1	3	1	2	2	1	4	4	3	2	2	1	1	2	2	1	2	1	1	1	3	1	2	2	1	4	4	3	2	2	1	1	2	2
ZMOp36x009	7	7	7	1	7	7	7	5	3	3	3	2	5	3	3	5	3	3	5	3	5	4	4	5	5	3	5	3	3	3	2	5	3	3	5	3	3	5	3	5	4	4	5	5	3	5	3	3	3
ZMOp36x011	5	5	5	1	5	5	5	5	5	4	5	5	5	4	5	5	4	4	5	5	5	5	4	5	5	4	5	5	4	5	5	5	4	5	5	4	4	5	5	5	5	4	5	5	4	5	5	4	5
ZMOp36x012	3	3	3	1	3	3	3	2	2	3	1	1	1	2	1	1	0	1	1	1	0	1	1	1	2	1	2	2	3	1	1	1	2	1	1	0	1	1	1	0	1	1	1	2	1	2	2	3	1
ZMOp36x013	2	2	2	1	2	2	2	0	0	0	1	0	0	0	0	0	0	0	0	0	0	1	0	1	0	0	0	0	0	1	0	0	0	0	0	0	0	0	0	0	1	0	1	0	0	0	0	0	1
ZMOp36x018	7	7	7	1	7	7	7	6	7	6	6	7	7	7	7	7	6	7	6	5	6	7	6	6	7	7	6	7	6	6	7	7	7	7	7	6	7	6	5	6	7	6	6	7	7	6	7	6	6
ZMOp36x025	29	29	29	1	29	29	29	21	24	26	23	21	24	23	26	24	22	22	20	19	20	26	24	27	23	18	21	24	26	23	21	24	23	26	24	22	22	20	19	20	26	24	27	23	18	21	24	26	23
ZMOp36x027	6	6	6	1	6	6	6	4	5	4	3	2	4	4	6	6	5	4	2	3	3	6	5	6	6	5	4	5	4	3	2	4	4	6	6	5	4	2	3	3	6	5	6	6	5	4	5	4	3
ZMOp36x028	3	3	3	1	3	3	3	2	2	2	2	2	2	2	3	2	2	2	2	2	3	2	2	2	2	2	2	2	2	2	2	2	2	3	2	2	2	2	2	3	2	2	2	2	2	2	2	2	2
ZMOp36x029	5	5	5	1	5	5	5	2	3	3	3	3	3	2	3	3	3	4	2	4	4	4	3	5	4	2	2	3	3	3	3	3	2	3	3	3	4	2	4	4	4	3	5	4	2	2	3	3	3
ZMOp36x030	5	5	5	1	5	5	5	2	2	4	3	3	3	5	2	3	2	2	3	3	1	2	2	2	2	2	2	2	4	3	3	3	5	2	3	2	2	3	3	1	2	2	2	2	2	2	2	4	3
ZMOp36x031	5	5	5	1	5	5	5	4	3	2	4	2	3	4	3	3	3	4	3	4	3	3	2	3	3	2	4	3	2	4	2	3	4	3	3	3	4	3	4	3	3	2	3	3	2	4	3	2	4
ZMOp36x032	4	4	4	1	4	4	4	2	3	3	3	3	3	2	2	2	2	2	2	2	3	3	2	3	3	2	2	3	3	3	3	3	2	2	2	2	2	2	2	3	3	2	3	3	2	2	3	3	3
ZMOp36x034	2	2	2	1	2	2	2	2	2	2	2	2	2	2	2	2	2	2	2	2	2	2	2	2	2	2	2	2	2	2	2	2	2	2	2	2	2	2	2	2	2	2	2	2	2	2	2	2	2
ZMOp36x038	13	13	13	1	13	13	13	9	11	11	11	9	10	10	10	9	10	10	11	9	8	8	10	7	10	10	9	11	11	11	9	10	10	10	9	10	10	11	9	8	8	10	7	10	10	9	11	11	11
ZMOp36x039	10	10	10	1	10	10	10	8	9	8	9	8	10	9	8	8	10	9	8	7	10	10	9	8	8	8	8	9	8	9	8	10	9	8	8	10	9	8	7	10	10	9	8	8	8	8	9	8	9
ZMOp36x040	5	5	5	1	5	5	5	2	5	4	5	3	4	4	4	3	3	3	3	3	2	3	2	3	3	4	2	5	4	5	3	4	4	4	3	3	3	3	3	2	3	2	3	3	4	2	5	4	5
ZMOp36x044	14	14	14	1	14	14	14	10	5	5	7	3	7	6	7	4	11	9	7	9	12	11	8	11	11	8	10	5	5	7	3	7	6	7	4	11	9	7	9	12	11	8	11	11	8	10	5	5	7
ZMOp39x004	6	6	6	1	6	6	6	5	4	4	4	4	4	5	4	3	4	4	5	4	4	3	4	3	2	4	5	4	4	4	4	4	5	4	3	4	4	5	4	4	3	4	3	2	4	5	4	4	4
ZMOp39x005	6	6	6	1	6	6	6	1	2	2	1	2	1	2	3	2	1	3	0	3	3	2	6	2	1	3	1	2	2	1	2	1	2	3	2	1	3	0	3	3	2	6	2	1	3	1	2	2	1
ZMOp39x007	16	16	16	1	16	16	16	1	9	9	9	9	6	8	9	8	0	0	0	2	1	6	9	6	10	7	1	9	9	9	9	6	8	9	8	0	0	0	2	1	6	9	6	10	7	1	9	9	9
ZMOp39x008	18	18	18	1	18	18	18	15	16	15	17	16	17	17	14	14	17	16	15	16	17	16	17	16	15	16	15	16	15	17	16	17	17	14	14	17	16	15	16	17	16	17	16	15	16	15	16	15	17
ZMOp39x009	12	12	12	1	12	12	12	11	12	10	11	11	11	10	12	11	12	11	10	9	11	9	10	9	9	11	11	12	10	11	11	11	10	12	11	12	11	10	9	11	9	10	9	9	11	11	12	10	11
ZMOp39x010	3	3	3	1	3	3	3	1	1	2	2	2	2	1	2	1	1	1	2	2	1	1	2	2	2	3	1	1	2	2	2	2	1	2	1	1	1	2	2	1	1	2	2	2	3	1	1	2	2
ZMOp39x013	2	2	2	1	2	2	2	0	0	0	0	0	0	0	0	0	1	0	0	1	0	0	1	1	0	1	0	0	0	0	0	0	0	0	0	1	0	0	1	0	0	1	1	0	1	0	0	0	0
ZMOp39x015	4	4	4	1	4	4	4	3	4	2	3	3	3	2	3	3	3	3	2	1	3	3	4	3	3	2	3	4	2	3	3	3	2	3	3	3	3	2	1	3	3	4	3	3	2	3	4	2	3
ZMOp39x016	7	7	7	1	7	7	7	2	0	1	1	1	1	1	2	2	1	2	0	1	0	5	5	3	2	1	2	0	1	1	1	1	1	2	2	1	2	0	1	0	5	5	3	2	1	2	0	1	1
ZMOp39x018	20	20	20	1	20	20	20	17	16	16	17	15	16	15	16	20	15	14	15	14	14	19	18	20	19	14	17	16	16	17	15	16	15	16	20	15	14	15	14	14	19	18	20	19	14	17	16	16	17
ZMOp39x020; ZMOp33x039	3;2	3;2	3;2	2	3	3	3	1	2	2	3	2	2	2	2	1	2	1	1	2	2	2	2	1	2	1	1	2	2	3	2	2	2	2	1	2	1	1	2	2	2	2	1	2	1	1	2	2	3
ZMOp39x021; ZMOp33x040	1;1	1;1	1;1	2	1	1	1	0	0	0	0	0	1	1	1	1	0	1	0	0	0	1	1	1	1	1	0	0	0	0	0	1	1	1	1	0	1	0	0	0	1	1	1	1	1	0	0	0	0
ZMOp39x027	17	17	17	1	17	17	17	4	1	1	1	1	1	1	2	6	1	1	2	4	4	15	13	14	15	1	4	1	1	1	1	1	1	2	6	1	1	2	4	4	15	13	14	15	1	4	1	1	1
ZMOp39x030	9	9	9	1	9	9	9	8	6	3	6	4	6	4	5	7	7	6	7	6	4	6	6	7	8	4	8	6	3	6	4	6	4	5	7	7	6	7	6	4	6	6	7	8	4	8	6	3	6
ZMOp39x031	9	9	9	1	9	9	9	3	7	6	6	6	8	7	7	8	2	6	5	5	3	5	5	7	6	6	3	7	6	6	6	8	7	7	8	2	6	5	5	3	5	5	7	6	6	3	7	6	6
ZMOp39x033; ZMOp32x015	4;4	1;1	1;1	2	4	1	1	3	1	2	2	1	2	1	2	1	3	2	2	2	3	2	2	2	1	1	0	0	1	1	0	0	0	1	0	1	0	0	1	0	0	0	1	0	0	0	0	1	1
ZMOp39x034	6	5	5	1	6	5	5	6	5	6	5	5	5	5	4	5	5	5	5	4	4	6	6	4	6	6	5	4	5	4	4	4	4	3	4	4	4	4	3	3	5	5	3	5	5	5	4	5	4
[truncated: 118 more columns]
